# Supplementary material for: Assessing reliability of intra-tumor heterogeneity estimates from single sample whole exome sequencing data
Source: PubMed Central journal article supplement (PMC6837753; doi:10.1371/journal.pone.0224143), 2019-11-07
Supplement: pone.0224143.s005.pdf [file pone.0224143.s005.pdf]

|                            | <b>BRCA</b> | <b>BLCA</b> | <b>HNSC</b> |
|----------------------------|-------------|-------------|-------------|
| number of samples          | 962         | 351         | 445         |
| <b>Protected mutations</b> |             |             |             |
| average                    | 530         | 735         | 456         |
| std                        | 1,189       | 890         | 544         |
| min                        | 79          | 61          | 31          |
| median                     | 342         | 525         | 340         |
| max                        | 21,821      | 12,774      | 7,941       |
| <b>Public mutations</b>    |             |             |             |
| average                    | 121         | 352         | 202         |
| std                        | 375         | 426         | 271         |
| min                        | 1           | 2           | 1           |
| median                     | 63          | 241         | 140         |
| max                        | 7,919       | 5,478       | 3,935       |
