# Supplementary material for: Assessing reliability of intra-tumor heterogeneity estimates from single sample whole exome sequencing data
Source: PubMed Central journal article supplement (PMC6837753; doi:10.1371/journal.pone.0224143), 2019-11-07
Supplement: pone.0224143.s006.pdf [file pone.0224143.s006.pdf]

| Variable                                            | Hazard ratio | P-value      | Corrected P-value |
|-----------------------------------------------------|--------------|--------------|-------------------|
| age_at_diagnosis                                    | 1.032023     | 4.328538e-05 | 0.000577          |
| PROSPECTIVE_COLLECTION_NO                           | 0.885701     | 4.431127e-01 | 0.631390          |
| PROSPECTIVE_COLLECTION_YES                          | 1.129050     | 4.431127e-01 | 0.631390          |
| RETROSPECTIVE_COLLECTION_NO                         | 1.138738     | 4.114412e-01 | 0.631390          |
| RETROSPECTIVE_COLLECTION_YES                        | 0.885701     | 4.431127e-01 | 0.631390          |
| SEX_Female                                          | 1.114329     | 5.131653e-01 | 0.651638          |
| SEX_Male                                            | 0.897401     | 5.131653e-01 | 0.651638          |
| RACE_WHITE                                          | 1.144930     | 5.054529e-01 | 0.651638          |
| HISTORY_OTHER_MALIGNANCY_No                         | 1.100403     | 5.660149e-01 | 0.696634          |
| HISTORY_OTHER_MALIGNANCY_Yes                        | 0.908758     | 5.660149e-01 | 0.696634          |
| NONINVASIVE_BLADDER_HISTORY_NO                      | 0.878835     | 3.891088e-01 | 0.610367          |
| NONINVASIVE_BLADDER_HISTORY_YES                     | 0.868563     | 4.940541e-01 | 0.651638          |
| NONINVASIVE_BLADDER_HISTORY_[Not Available]         | 1.298013     | 1.113381e-01 | 0.329891          |
| NONINVASIVE_BLADDER_CA_TX_TYPE_[Not Applicable]     | 0.878835     | 3.891088e-01 | 0.610367          |
| NONINVASIVE_BLADDER_CA_TX_TYPE_[Not Available]      | 1.225435     | 2.146545e-01 | 0.490639          |
| TX_90DAYS_POST_RESECTION_[Not Applicable]           | 0.878835     | 3.891088e-01 | 0.610367          |
| TX_90DAYS_POST_RESECTION_[Not Available]            | 1.329106     | 6.724015e-02 | 0.244510          |
| TX_COMPLETE_RESPONSE_[Not Applicable]               | 0.878835     | 3.891088e-01 | 0.610367          |
| TX_COMPLETE_RESPONSE_[Not Available]                | 1.183784     | 2.774378e-01 | 0.539748          |
| TX_INDUCTION_COURSES_INDICATOR_[Not Applicable]     | 0.878835     | 3.891088e-01 | 0.610367          |
| TX_INDUCTION_COURSES_INDICATOR_[Not Available]      | 1.234697     | 1.748396e-01 | 0.436750          |
| TX_MAINTENANCE_COURSES_INDICATOR_[Not Applicable]   | 0.878835     | 3.891088e-01 | 0.610367          |
| TX_MAINTENANCE_COURSES_INDICATOR_[Not Available]    | 1.233463     | 1.768826e-01 | 0.436750          |
| OCCUPATION_CURRENT_Retired                          | 0.917140     | 6.255270e-01 | 0.733401          |
| OCCUPATION_CURRENT_[Not Available]                  | 1.271108     | 1.467738e-01 | 0.404893          |
| OCCUPATION_CURRENT_retired                          | 0.960885     | 8.446695e-01 | 0.889126          |
| OCCUPATION_PRIMARY_[Not Available]                  | 1.295025     | 9.419336e-02 | 0.301419          |
| OCCUPATION_PRIMARY_CHEMICAL_EXPOSURE_[Not Avail...] | 1.765620     | 4.091600e-03 | 0.032733          |
| OCCUPATION_PRIMARY_INDUSTRY_[Not Available]         | 1.160094     | 3.247413e-01 | 0.590439          |
| FAMILY_HISTORY_CANCER_RELATIONSHIP_[Not Available]  | 1.226713     | 1.856187e-01 | 0.436750          |
| FAMILY_HISTORY_CANCER_TYPE_[Not Available]          | 1.226713     | 1.856187e-01 | 0.436750          |
| RADIATION_TREATMENT_ADJUVANT_NO                     | 0.712057     | 2.632089e-02 | 0.131604          |
| RADIATION_TREATMENT_ADJUVANT_[Not Available]        | 1.354145     | 5.230845e-02 | 0.210985          |
| PHARMACEUTICAL_TX_ADJUVANT_NO                       | 0.986814     | 9.296012e-01 | 0.941368          |
| PHARMACEUTICAL_TX_ADJUVANT_YES                      | 0.676359     | 4.539278e-02 | 0.201746          |
| PHARMACEUTICAL_TX_ADJUVANT_[Not Available]          | 1.387004     | 3.427365e-02 | 0.161288          |
| HISTOLOGICAL_SUBTYPE_Non-Papillary                  | 1.364821     | 7.158132e-02 | 0.248979          |
| HISTOLOGICAL_SUBTYPE_Papillary                      | 0.673148     | 2.630851e-02 | 0.131604          |
| METHOD_OF_INITIAL_SAMPLE_PROCUREMENT_Other meth...  | 0.813722     | 4.457771e-01 | 0.631390          |
| METHOD_OF_INITIAL_SAMPLE_PROCUREMENT_Transureth...  | 1.234871     | 2.692175e-01 | 0.539748          |
| METHOD_OF_INITIAL_SAMPLE_PROCUREMENT_OTHER_[Not...] | 1.290044     | 3.459972e-01 | 0.610367          |
| AJCC_STAGING_EDITION_6th                            | 0.931002     | 6.427039e-01 | 0.733401          |
| AJCC_STAGING_EDITION_7th                            | 1.061071     | 7.031650e-01 | 0.760178          |
| ANGIOLYMPHATIC_INVASION_NO                          | 0.485392     | 3.934074e-05 | 0.000577          |
| ANGIOLYMPHATIC_INVASION_YES                         | 1.818002     | 6.992848e-05 | 0.000799          |
| ANGIOLYMPHATIC_INVASION_[Not Available]             | 1.282364     | 1.626703e-01 | 0.433787          |
| LYMPH_NODES_EXAMINED_NO                             | 0.861162     | 4.914651e-01 | 0.651638          |
| LYMPH_NODES_EXAMINED_YES                            | 1.144075     | 4.498650e-01 | 0.631390          |

|                                                 |          |              |          |
|-------------------------------------------------|----------|--------------|----------|
| EXTRACAPSULAR_EXTENSION_NO                      | 1.101253 | 5.846915e-01 | 0.708717 |
| EXTRACAPSULAR_EXTENSION_YES                     | 1.411088 | 5.538363e-02 | 0.210985 |
| EXTRACAPSULAR_EXTENSION_[Not Available]         | 0.748263 | 5.291460e-02 | 0.210985 |
| EXTRACAPSULAR_EXTENSION_PRESENT_[Not Available] | 0.804289 | 2.901143e-01 | 0.539748 |
| METASTATIC_SITE_Lymph node only                 | 1.687527 | 6.731283e-03 | 0.041832 |
| METASTATIC_SITE_None                            | 0.641938 | 5.729977e-03 | 0.041673 |
| METASTATIC_SITE_[Not Available]                 | 1.050773 | 7.417814e-01 | 0.791234 |
| AJCC_PATHOLOGIC_TUMOR_STAGE_Stage II            | 0.457221 | 3.329395e-05 | 0.000577 |
| AJCC_PATHOLOGIC_TUMOR_STAGE_Stage III           | 0.840677 | 2.814664e-01 | 0.539748 |
| AJCC_PATHOLOGIC_TUMOR_STAGE_Stage IV            | 2.264256 | 4.728912e-08 | 0.000004 |
| INCIDENTAL_PROSTATE_CANCER_NO                   | 1.002834 | 9.852841e-01 | 0.985284 |
| INCIDENTAL_PROSTATE_CANCER_YES                  | 0.926590 | 6.685831e-01 | 0.742870 |
| INCIDENTAL_PROSTATE_CANCER_[Not Available]      | 1.107850 | 6.188245e-01 | 0.733401 |
| AJCC_INCIDENTAL_PROSTATE_CANCER_[Not Available] | 1.135748 | 4.866109e-01 | 0.651638 |
| PRIMARY_SITE_Bladder - NOS                      | 0.839975 | 2.465470e-01 | 0.533075 |
| CLIN_T_STAGE_T2                                 | 1.072482 | 6.867865e-01 | 0.752643 |
| CLIN_T_STAGE_[Not Available]                    | 0.801825 | 1.408015e-01 | 0.402290 |
| ICD_10_C67.2                                    | 0.981491 | 9.276451e-01 | 0.941368 |
| ICD_10_C67.9                                    | 0.934338 | 6.508937e-01 | 0.733401 |
| ICD_O_3_HISTOLOGY_8120/3                        | 1.264392 | 2.765995e-01 | 0.539748 |
| ICD_O_3_HISTOLOGY_8130/3                        | 0.790498 | 2.838725e-01 | 0.539748 |
| ICD_O_3_SITE_C67.2                              | 0.981491 | 9.276451e-01 | 0.941368 |
| ICD_O_3_SITE_C67.9                              | 0.934338 | 6.508937e-01 | 0.733401 |
| TISSUE_SOURCE_SITE_DK                           | 0.563206 | 2.178870e-02 | 0.124507 |
| TISSUE_SOURCE_SITE_XF                           | 1.263603 | 2.246627e-01 | 0.499250 |
| AJCC_TUMOR_PATHOLOGIC_PT_simple_T2              | 0.515628 | 4.470852e-04 | 0.004471 |
| AJCC_TUMOR_PATHOLOGIC_PT_simple_T3              | 1.271201 | 1.094625e-01 | 0.329891 |
| AJCC_TUMOR_PATHOLOGIC_PT_simple_T4              | 1.880901 | 9.411876e-04 | 0.008366 |
| AJCC_NODES_PATHOLOGIC_PN_simple_N0              | 0.450186 | 1.450583e-07 | 0.000006 |
| AJCC_NODES_PATHOLOGIC_PN_simple_N2              | 2.130213 | 5.222366e-06 | 0.000139 |
| AJCC_METASTASIS_PATHOLOGIC_PM_simple_M0         | 0.663211 | 6.797682e-03 | 0.041832 |
| AJCC_METASTASIS_PATHOLOGIC_PM_simple_MX         | 1.305408 | 7.476644e-02 | 0.249221 |
