# Supplementary material for: Assessing reliability of intra-tumor heterogeneity estimates from single sample whole exome sequencing data
Source: PubMed Central journal article supplement (PMC6837753; doi:10.1371/journal.pone.0224143), 2019-11-07
Supplement: pone.0224143.s007.pdf [file pone.0224143.s007.pdf]

| Variable                                              | Hazard ratio | P-value      | Corrected P-value |
|-------------------------------------------------------|--------------|--------------|-------------------|
| age_at_diagnosis                                      | 1.032118     | 4.566898e-07 | 1.077788e-05      |
| PROSPECTIVE_COLLECTION_NO                             | 0.602422     | 4.530180e-02 | 1.243166e-01      |
| PROSPECTIVE_COLLECTION_YES                            | 1.686136     | 3.888498e-02 | 1.176520e-01      |
| RETROSPECTIVE_COLLECTION_NO                           | 1.686136     | 3.888498e-02 | 1.176520e-01      |
| RETROSPECTIVE_COLLECTION_YES                          | 0.602422     | 4.530180e-02 | 1.243166e-01      |
| MENOPAUSE_STATUS_Post (prior bilateral ovariect...    | 1.324224     | 9.572180e-02 | 2.026486e-01      |
| MENOPAUSE_STATUS_Pre (≥6 months since LMP AND n...    | 0.431889     | 8.809889e-04 | 5.887468e-03      |
| MENOPAUSE_STATUS_[Not Available]                      | 2.943808     | 9.817809e-07 | 1.930836e-05      |
| RACE_BLACK OR AFRICAN AMERICAN                        | 1.215466     | 3.390936e-01 | 5.275821e-01      |
| RACE_WHITE                                            | 0.825045     | 2.987240e-01 | 4.828689e-01      |
| RACE_[Not Available]                                  | 1.274439     | 5.361448e-01 | 6.741716e-01      |
| ETHNICITY_NOT HISPANIC OR LATINO                      | 2.207632     | 1.176302e-02 | 5.552148e-02      |
| ETHNICITY_[Not Available]                             | 0.603636     | 1.259999e-01 | 2.447704e-01      |
| HISTORY_OTHER_MALIGNANCY_No                           | 0.669493     | 2.469654e-01 | 4.047489e-01      |
| HISTORY_OTHER_MALIGNANCY_Yes                          | 1.501028     | 2.411757e-01 | 4.016651e-01      |
| RADIATION_TREATMENT_ADJUVANT_NO                       | 0.825072     | 6.454644e-01 | 7.693415e-01      |
| RADIATION_TREATMENT_ADJUVANT_YES                      | 1.184551     | 6.240900e-01 | 7.525332e-01      |
| RADIATION_TREATMENT_ADJUVANT_[Not Available]          | 0.991267     | 9.744419e-01 | 9.936324e-01      |
| PHARMACEUTICAL_TX_ADJUVANT_YES                        | 0.893189     | 7.194462e-01 | 8.162947e-01      |
| PHARMACEUTICAL_TX_ADJUVANT_[Not Available]            | 1.001332     | 9.961223e-01 | 9.961223e-01      |
| METHOD_OF_INITIAL_SAMPLE_PROCUREMENT_Core<br>needl... | 0.545734     | 3.371119e-04 | 2.841372e-03      |
| METHOD_OF_INITIAL_SAMPLE_PROCUREMENT_Fine<br>needl... | 1.669895     | 1.358907e-02 | 5.938927e-02      |
| METHOD_OF_INITIAL_SAMPLE_PROCUREMENT_Other<br>meth... | 1.009070     | 9.765300e-01 | 9.936324e-01      |
| METHOD_OF_INITIAL_SAMPLE_PROCUREMENT_Tumor<br>rese... | 0.740284     | 3.397987e-01 | 5.275821e-01      |
| METHOD_OF_INITIAL_SAMPLE_PROCUREMENT_[Not<br>Avail... | 1.944929     | 3.630026e-02 | 1.157684e-01      |
| METHOD_OF_INITIAL_SAMPLE_PROCUREMENT_OTHER_[Not...    | 0.994946     | 9.868232e-01 | 9.952576e-01      |
| SURGICAL_PROCEDURE_FIRST_Lumpectomy                   | 0.690083     | 9.704508e-02 | 2.026486e-01      |
| SURGICAL_PROCEDURE_FIRST_Modified Radical Maste...    | 1.476196     | 2.170723e-02 | 8.004541e-02      |
| SURGICAL_PROCEDURE_FIRST_Other                        | 0.882243     | 5.027363e-01 | 6.448140e-01      |
| SURGICAL_PROCEDURE_FIRST_Simple Mastectomy            | 0.657380     | 9.788958e-02 | 2.026486e-01      |
| SURGICAL_PROCEDURE_FIRST_[Not Available]              | 2.480055     | 2.729308e-03 | 1.463901e-02      |
| FIRST_SURGICAL_PROCEDURE_OTHER_Surgical Resection     | 1.534372     | 3.107861e-01 | 4.955778e-01      |
| FIRST_SURGICAL_PROCEDURE_OTHER_[Not Available]        | 1.084261     | 6.601793e-01 | 7.790115e-01      |
| PATH_MARGIN_Negative                                  | 0.328745     | 2.487080e-11 | 1.467377e-09      |
| PATH_MARGIN_Positive                                  | 1.456750     | 1.265338e-01 | 2.447704e-01      |
| PATH_MARGIN_[Not Available]                           | 4.295169     | 1.280242e-14 | 1.510685e-12      |
| SURGERY_FOR_POSITIVE_MARGINS_[Not Available]          | 0.881873     | 7.014933e-01 | 8.141488e-01      |
| MARGIN_STATUS_REEXCISION_Negative                     | 1.189978     | 5.498957e-01 | 6.830283e-01      |
| MARGIN_STATUS_REEXCISION_[Not Available]              | 0.788031     | 3.970790e-01 | 5.714063e-01      |
| STAGING_SYSTEM_Axillary lymph node dissection a...    | 1.147628     | 4.478192e-01 | 6.047185e-01      |
| STAGING_SYSTEM_Sentinel lymph node biopsy plus ...    | 0.471890     | 9.803200e-04 | 6.088303e-03      |
| STAGING_SYSTEM_Sentinel node biopsy alone             | 0.517762     | 9.212199e-03 | 4.529331e-02      |
| STAGING_SYSTEM_[Not Available]                        | 2.306054     | 2.789049e-06 | 3.502342e-05      |
| MICROMET_DETECTION_BY_IHC_NO                          | 0.983191     | 9.205373e-01 | 9.860025e-01      |
| MICROMET_DETECTION_BY_IHC_YES                         | 0.330809     | 1.172534e-05 | 1.257809e-04      |
| MICROMET_DETECTION_BY_IHC_[Not Available]             | 2.187550     | 2.968086e-06 | 3.502342e-05      |
| LYMPH_NODES_EXAMINED_YES                              | 1.127012     | 4.842736e-01 | 6.279592e-01      |

|                                                    |          |              |              |
|----------------------------------------------------|----------|--------------|--------------|
| LYMPH.NODES_EXAMINED_[Not Available]               | 0.789955 | 1.767459e-01 | 3.160002e-01 |
| AJCC_STAGING_EDITION_5th                           | 2.522972 | 2.425021e-06 | 3.502342e-05 |
| AJCC_STAGING_EDITION_6th                           | 0.391254 | 3.279076e-07 | 9.673274e-06 |
| AJCC_STAGING_EDITION_7th                           | 1.553473 | 5.971021e-02 | 1.455199e-01 |
| AJCC_STAGING_EDITION_[Not Available]               | 0.905993 | 7.048542e-01 | 8.141488e-01 |
| AJCC_PATHOLOGIC_TUMOR_STAGE_Stage I                | 0.623674 | 1.050290e-01 | 2.136796e-01 |
| AJCC_PATHOLOGIC_TUMOR_STAGE_Stage IA               | 0.246046 | 1.650590e-02 | 6.956059e-02 |
| AJCC_PATHOLOGIC_TUMOR_STAGE_Stage IIA              | 0.697084 | 6.472348e-02 | 1.510602e-01 |
| AJCC_PATHOLOGIC_TUMOR_STAGE_Stage IIB              | 0.828285 | 3.501038e-01 | 5.365227e-01 |
| AJCC_PATHOLOGIC_TUMOR_STAGE_Stage IIIA             | 1.293391 | 2.416799e-01 | 4.016651e-01 |
| AJCC_PATHOLOGIC_TUMOR_STAGE_Stage IIIC             | 1.898479 | 6.528872e-02 | 1.510602e-01 |
| ER_STATUS_BY_IHC_Negative                          | 1.272320 | 1.906432e-01 | 3.308221e-01 |
| ER_STATUS_BY_IHC_Positive                          | 0.662619 | 1.727163e-02 | 7.027765e-02 |
| ER_STATUS_IHC_PERCENT_POSITIVE_90-99%              | 0.370064 | 2.554685e-03 | 1.435490e-02 |
| ER_STATUS_IHC_PERCENT_POSITIVE_10%                 | 0.771901 | 4.520339e-01 | 6.047185e-01 |
| ER_STATUS_IHC_PERCENT_POSITIVE_[Not Available]     | 2.276830 | 1.936838e-05 | 1.758053e-04 |
| ER_POSITIVITY_SCALE_USED_3 Point Scale             | 0.369684 | 5.031369e-02 | 1.349322e-01 |
| ER_POSITIVITY_SCALE_USED_[Not Available]           | 2.435285 | 3.311614e-02 | 1.116487e-01 |
| ER_POSITIVITY_SCALE_OTHER_[Not Available]          | 1.595260 | 1.827359e-01 | 3.218334e-01 |
| BRACHYTHERAPY_TOTAL_DOSE_POINT_A_[Not Available]   | 0.994099 | 9.767911e-01 | 9.936324e-01 |
| PR_STATUS_BY_IHC_Negative                          | 1.257745 | 1.746637e-01 | 3.160002e-01 |
| PR_STATUS_BY_IHC_Positive                          | 0.717066 | 4.336782e-02 | 1.243166e-01 |
| PR_STATUS_IHC_PERCENT_POSITIVE_90-99%              | 0.082244 | 1.281943e-02 | 5.818049e-02 |
| PR_STATUS_IHC_PERCENT_POSITIVE_10%                 | 0.987074 | 9.609962e-01 | 9.936324e-01 |
| PR_STATUS_IHC_PERCENT_POSITIVE_[Not Available]     | 2.440652 | 1.832734e-05 | 1.758053e-04 |
| PR_POSITIVITY_SCALE_USED_3 Point Scale             | 0.401865 | 7.305251e-02 | 1.626452e-01 |
| PR_POSITIVITY_SCALE_USED_[Not Available]           | 2.235079 | 5.428402e-02 | 1.411211e-01 |
| PR_POSITIVITY_IHC_INTENSITY_SCORE_3+               | 0.127355 | 4.012324e-02 | 1.183636e-01 |
| PR_POSITIVITY_IHC_INTENSITY_SCORE_[Not Available]  | 3.001282 | 2.553857e-03 | 1.435490e-02 |
| PR_POSITIVITY_SCALE_OTHER_[Not Available]          | 1.327000 | 3.966578e-01 | 5.714063e-01 |
| PR_POSITIVITY_DEFINE_METHOD_[Not Available]        | 1.008404 | 9.676018e-01 | 9.936324e-01 |
| IHC_HER2_Equivocal                                 | 0.601537 | 5.547120e-02 | 1.411211e-01 |
| IHC_HER2_Negative                                  | 0.791443 | 1.711526e-01 | 3.155626e-01 |
| IHC_HER2_Positive                                  | 1.504160 | 7.472326e-02 | 1.632842e-01 |
| IHC_HER2_[Not Available]                           | 1.460324 | 3.585853e-02 | 1.157684e-01 |
| HER2_IHC_PERCENT_POSITIVE_10%                      | 0.408510 | 2.110215e-02 | 8.004541e-02 |
| HER2_IHC_PERCENT_POSITIVE_[Not Available]          | 1.864321 | 2.281919e-02 | 8.159588e-02 |
| HER2_POSITIVITY_METHOD_TEXT_[Not Available]        | 2.593860 | 6.042777e-02 | 1.455199e-01 |
| HER2_FISH_STATUS_Negative                          | 0.739080 | 1.150908e-01 | 2.301816e-01 |
| HER2_FISH_STATUS_Positive                          | 0.880007 | 7.106553e-01 | 8.141488e-01 |
| HER2_FISH_STATUS_[Not Available]                   | 1.385428 | 6.801151e-02 | 1.543338e-01 |
| HER2_COPY_NUMBER_[Not Available]                   | 1.645350 | 1.487810e-01 | 2.831638e-01 |
| CENT17_COPY_NUMBER_[Not Available]                 | 1.548415 | 2.047798e-01 | 3.502032e-01 |
| PRIMARY_SITE_Left                                  | 1.945749 | 7.591896e-04 | 5.599023e-03 |
| PRIMARY_SITE_Left Upper Inner Quadrant             | 0.734898 | 4.268913e-01 | 6.047185e-01 |
| PRIMARY_SITE_Left Upper Outer Quadrant             | 0.826630 | 4.397503e-01 | 6.047185e-01 |
| PRIMARY_SITE_Right                                 | 0.892605 | 6.249852e-01 | 7.525332e-01 |
| PRIMARY_SITE_Right Upper Outer Quadrant            | 1.138461 | 6.005181e-01 | 7.381368e-01 |
| HISTOLOGICAL_DIAGNOSIS_Infiltrating Ductal Carc... | 0.969817 | 8.637923e-01 | 9.351146e-01 |
| HISTOLOGICAL_DIAGNOSIS_Infiltrating Lobular Car... | 0.823077 | 3.912033e-01 | 5.714063e-01 |
| ICD.O_3_HISTOLOGY_8500/3                           | 0.949261 | 7.692879e-01 | 8.563771e-01 |
| ICD.O_3_HISTOLOGY_8520/3                           | 0.871304 | 5.370519e-01 | 6.741716e-01 |
| METASTATIC_TUMOR_INDICATOR_NO                      | 0.641384 | 2.830420e-02 | 9.823221e-02 |
| METASTATIC_TUMOR_INDICATOR_[Not Available]         | 1.149966 | 4.502190e-01 | 6.047185e-01 |

|                                         |          |              |              |
|-----------------------------------------|----------|--------------|--------------|
| TISSUE_SOURCE_SITE_A2                   | 0.816065 | 4.561012e-01 | 6.047185e-01 |
| TISSUE_SOURCE_SITE_A8                   | 1.386201 | 4.396658e-01 | 6.047185e-01 |
| TISSUE_SOURCE_SITE_AR                   | 0.426279 | 7.036257e-03 | 3.609906e-02 |
| TISSUE_SOURCE_SITE_B6                   | 1.053316 | 8.202897e-01 | 9.046185e-01 |
| TISSUE_SOURCE_SITE_BH                   | 2.772661 | 1.247824e-08 | 4.908109e-07 |
| TISSUE_SOURCE_SITE_D8                   | 0.947428 | 9.275108e-01 | 9.860025e-01 |
| TISSUE_SOURCE_SITE_E2                   | 0.555754 | 1.612908e-01 | 3.021003e-01 |
| TISSUE_SOURCE_SITE_E9                   | 1.350339 | 4.798622e-01 | 6.279592e-01 |
| AJCC_TUMOR_PATHOLOGIC_PT_simple_T1      | 0.686002 | 5.620924e-02 | 1.411211e-01 |
| AJCC_TUMOR_PATHOLOGIC_PT_simple_T2      | 0.951778 | 7.620026e-01 | 8.563458e-01 |
| AJCC_TUMOR_PATHOLOGIC_PT_simple_T3      | 1.220149 | 3.652398e-01 | 5.525423e-01 |
| AJCC_NODES_PATHOLOGIC_PN_simple_N0      | 0.428539 | 2.290188e-06 | 3.502342e-05 |
| AJCC_NODES_PATHOLOGIC_PN_simple_N1      | 1.159871 | 3.741624e-01 | 5.588754e-01 |
| AJCC_NODES_PATHOLOGIC_PN_simple_N2      | 1.714021 | 1.986213e-02 | 7.812439e-02 |
| AJCC_NODES_PATHOLOGIC_PN_simple_N3      | 2.564601 | 6.195610e-04 | 4.873880e-03 |
| AJCC_METASTASIS_PATHOLOGIC_PM_simple_M0 | 0.509375 | 8.980883e-04 | 5.887468e-03 |
| AJCC_METASTASIS_PATHOLOGIC_PM_simple_MX | 1.062431 | 8.307274e-01 | 9.076466e-01 |
