# Supplementary material for: Assessing reliability of intra-tumor heterogeneity estimates from single sample whole exome sequencing data
Source: PubMed Central journal article supplement (PMC6837753; doi:10.1371/journal.pone.0224143), 2019-11-07
Supplement: pone.0224143.s009.pdf [file pone.0224143.s009.pdf]

| CellType | Symbol   | AffymetrixID | EntrezGene | Gene Ensembl ID |
|----------|----------|--------------|------------|-----------------|
| B cells  | MS4A1    | 217418_x_at  | 931        | ENSG00000156738 |
| B cells  | TCL1A    | 209995_s_at  | 8115       | ENSG00000100721 |
| B cells  | MS4A1    | 210356_x_at  | 931        | ENSG00000156738 |
| B cells  | TCL1A    | 39318_at     | 8115       | ENSG00000100721 |
| B cells  | HLA-DOB  | 205671_s_at  | 3112       | ENSG00000241106 |
| B cells  | HLA-DOB  | 205671_s_at  | 3112       | ENSG00000239457 |
| B cells  | HLA-DOB  | 205671_s_at  | 3112       | ENSG00000243496 |
| B cells  | HLA-DOB  | 205671_s_at  | 3112       | ENSG00000241386 |
| B cells  | HLA-DOB  | 205671_s_at  | 3112       | ENSG00000241910 |
| B cells  | HLA-DOB  | 205671_s_at  | 3112       | ENSG00000243612 |
| B cells  | PNOC     | 205901_at    | 5368       | ENSG00000168081 |
| B cells  | KIAA0125 | 206478_at    | 9834       | ENSG00000277059 |
| B cells  | KIAA0125 | 206478_at    | 9834       | ENSG00000226777 |
| B cells  | CD19     | 206398_s_at  | 930        | ENSG00000177455 |
| B cells  | CR2      | 205544_s_at  | 1380       | ENSG00000117322 |
| B cells  | IGHG1    | 213674_x_at  | 3500       | NaN             |
| B cells  | FCRL2    | 221239_s_at  | 79368      | ENSG00000132704 |
| B cells  | BLK      | 206255_at    | 640        | ENSG00000136573 |
| B cells  | IGHG1    | 222285_at    | 3500       | NaN             |
| B cells  | COCH     | 205229_s_at  | 1690       | ENSG00000100473 |
| B cells  | OSBPL10  | 219073_s_at  | 114884     | ENSG00000144645 |
| B cells  | IGHA1    | 215118_s_at  | 3493       | NaN             |
| B cells  | TNFRSF17 | 206641_at    | 608        | ENSG00000048462 |
| B cells  | ABCB4    | 207819_s_at  | 5244       | ENSG00000005471 |
| B cells  | BLNK     | 207655_s_at  | 29760      | ENSG00000095585 |
| B cells  | GLDC     | 204836_at    | 2731       | ENSG00000178445 |
| B cells  | MEF2C    | 209200_at    | 4208       | ENSG00000081189 |
| B cells  | MEF2C    | 209199_s_at  | 4208       | ENSG00000081189 |
| B cells  | IGHM     | 209374_s_at  | 3507       | NaN             |
| B cells  | FAM30A   | 220377_at    | 29064      | NaN             |
| B cells  | SPIB     | 205861_at    | 6689       | ENSG00000269404 |
| B cells  | BCL11A   | 219497_s_at  | 53335      | ENSG00000119866 |
| B cells  | GNG7     | 206896_s_at  | 2788       | ENSG00000176533 |
| B cells  | IGKC     | 215217_at    | 3514       | NaN             |
| B cells  | CD72     | 215925_s_at  | 971        | ENSG00000137101 |
| B cells  | MICAL3   | 212715_s_at  | 57553      | ENSG00000243156 |
| B cells  | BCL11A   | 210347_s_at  | 53335      | ENSG00000119866 |
| B cells  | BACH2    | 221234_s_at  | 60468      | ENSG00000112182 |
| B cells  | IGL@     | 217138_x_at  | 3535       | NaN             |
| B cells  | CCR9     | 207445_s_at  | 10803      | ENSG00000173585 |
| B cells  | QRSL1    | 218948_at    | 55278      | ENSG00000130348 |
| B cells  | DTNB     | 215565_at    | 1838       | ENSG00000138101 |
| B cells  | HLA-DQA1 | 212671_s_at  | 3117       | ENSG00000236418 |
| B cells  | HLA-DQA1 | 212671_s_at  | 3117       | ENSG00000232062 |
| B cells  | HLA-DQA1 | 212671_s_at  | 3117       | ENSG00000223793 |
| B cells  | HLA-DQA1 | 212671_s_at  | 3117       | ENSG00000231526 |
| B cells  | HLA-DQA1 | 212671_s_at  | 3117       | ENSG00000257473 |
| B cells  | HLA-DQA1 | 212671_s_at  | 3117       | ENSG00000228284 |
| B cells  | HLA-DQA1 | 212671_s_at  | 3117       | ENSG00000225890 |
| B cells  | HLA-DQA1 | 212671_s_at  | 3117       | ENSG00000231823 |
| B cells  | HLA-DQA1 | 212671_s_at  | 3117       | ENSG00000206301 |
| B cells  | HLA-DQA1 | 212671_s_at  | 3117       | ENSG00000206305 |

|                |          |             |        |                 |
|----------------|----------|-------------|--------|-----------------|
| B cells        | HLA-DQA1 | 212671_s_at | 3117   | ENSG00000225103 |
| B cells        | HLA-DQA1 | 212671_s_at | 3117   | ENSG00000233192 |
| B cells        | HLA-DQA1 | 212671_s_at | 3117   | ENSG00000196735 |
| B cells        | HLA-DQA1 | 212671_s_at | 3117   | ENSG00000237541 |
| B cells        | SCN3A    | 210432_s_at | 6328   | ENSG00000153253 |
| B cells        | QRSL1    | 218949_s_at | 55278  | ENSG00000130348 |
| B cells        | SLC15A2  | 205316_at   | 6565   | ENSG00000163406 |
| T cells        | PRKCQ    | 210038_at   | 5588   | ENSG00000065675 |
| T cells        | CD3D     | 213539_at   | 915    | ENSG00000167286 |
| T cells        | CD3G     | 206804_at   | 917    | ENSG00000160654 |
| T cells        | CD28     | 206545_at   | 940    | ENSG00000178562 |
| T cells        | LCK      | 204891_s_at | 3932   | ENSG00000182866 |
| T cells        | TRAT1    | 217147_s_at | 50852  | ENSG00000163519 |
| T cells        | PRKCQ    | 210039_s_at | 5588   | ENSG00000065675 |
| T cells        | BCL11B   | 219528_s_at | 64919  | ENSG00000127152 |
| T cells        | CD2      | 205831_at   | 914    | ENSG00000116824 |
| T cells        | LCK      | 204890_s_at | 3932   | ENSG00000182866 |
| T cells        | TRBC1    | 213193_x_at | 28639  | NaN             |
| T cells        | TRBC1    | 210915_x_at | 28639  | NaN             |
| T cells        | TRA@     | 209670_at   | 28755  | NaN             |
| T cells        | ITM2A    | 202747_s_at | 9452   | ENSG00000078596 |
| T cells        | SH2D1A   | 210116_at   | 4068   | ENSG00000183918 |
| T cells        | CD6      | 213958_at   | 923    | ENSG00000013725 |
| T cells        | CD96     | 206761_at   | 10225  | ENSG00000153283 |
| T cells        | NCALD    | 211685_s_at | 83988  | ENSG00000104490 |
| T cells        | GIMAP5   | 218805_at   | 55340  | ENSG00000196329 |
| T cells        | TRA@     | 209671_x_at | 6955   | NaN             |
| T cells        | CD3E     | 205456_at   | 916    | ENSG00000198851 |
| T cells        | SKAP1    | 205790_at   | 8631   | ENSG00000141293 |
| T cells        | TRA@     | 213830_at   | 6955   | NaN             |
| T cells        | TRA@     | 216191_s_at | 6955   | NaN             |
| T helper cells | ICOS     | 210439_at   | 29851  | ENSG00000163600 |
| T helper cells | LRBA     | 214109_at   | 987    | ENSG00000198589 |
| T helper cells | ITM2A    | 202746_at   | 9452   | ENSG00000078596 |
| T helper cells | FAM111A  | 218248_at   | 63901  | ENSG00000166801 |
| T helper cells | PHF10    | 219126_at   | 55274  | ENSG00000130024 |
| T helper cells | NUP107   | 218768_at   | 57122  | ENSG00000111581 |
| T helper cells | SEC24C   | 202361_at   | 9632   | ENSG00000176986 |
| T helper cells | NAP1L4   | 201414_s_at | 4676   | ENSG00000205531 |
| T helper cells | NAP1L4   | 201414_s_at | 4676   | ENSG00000273562 |
| T helper cells | BATF     | 205965_at   | 10538  | ENSG00000156127 |
| T helper cells | ASF1A    | 203428_s_at | 25842  | ENSG00000111875 |
| T helper cells | FRYL     | 212546_s_at | 285527 | ENSG00000075539 |
| T helper cells | FUSIP1   | 213594_x_at | 10772  | ENSG00000188529 |
| T helper cells | TRA@     | 215524_x_at | 10730  | ENSG00000136758 |
| T helper cells | TRA@     | 217412_at   | 6955   | NaN             |
| T helper cells | RPA1     | 201528_at   | 6117   | ENSG00000132383 |
| T helper cells | UBE2L3   | 200683_s_at | 7332   | ENSG00000185651 |
| T helper cells | ANP32B   | 201306_s_at | 10541  | ENSG00000136938 |
| T helper cells | DDX50    | 221699_s_at | 79009  | ENSG00000107625 |
| T helper cells | C13orf34 | 219544_at   | 79866  | ENSG00000136122 |
| T helper cells | PPP2R5C  | 213305_s_at | 5527   | ENSG00000078304 |
| T helper cells | SLC25A12 | 203340_s_at | 8604   | ENSG00000115840 |
| T helper cells | ATF2     | 205446_s_at | 1386   | ENSG00000115966 |

|                |              |             |        |                 |
|----------------|--------------|-------------|--------|-----------------|
| T helper cells | CD28         | 211856_x.at | 940    | ENSG00000178562 |
| T helper cells | GOLGA8A      | 208798_x.at | 23015  | ENSG00000175265 |
| Tcm            | CDC14A       | 210441_at   | 8556   | ENSG00000079335 |
| Tcm            | ATM          | 208442_s.at | 472    | ENSG00000149311 |
| Tcm            | USP9Y        | 206624_at   | 8287   | ENSG00000114374 |
| Tcm            | PCNX         | 215175_at   | 22990  | ENSG00000100731 |
| Tcm            | ATM          | 210858_x.at | 472    | ENSG00000149311 |
| Tcm            | FOXP1        | 215221_at   | 27086  | ENSG00000114861 |
| Tcm            | KLF12        | 206965_at   | 11278  | ENSG00000118922 |
| Tcm            | ST3GAL1      | 215874_at   | 6482   | ENSG00000008513 |
| Tcm            | INPP4B       | 215864_at   | 8821   | ENSG00000109452 |
| Tcm            | CASP8        | 207686_s.at | 841    | ENSG00000064012 |
| Tcm            | MLL          | 216624_s.at | 4297   | ENSG00000118058 |
| Tcm            | PCM1         | 209997_x.at | 5108   | ENSG00000078674 |
| Tcm            | RP11-74E24.2 | 205787_x.at | 441155 | ENSG00000215817 |
| Tcm            | PHC3         | 215521_at   | 80012  | ENSG00000173889 |
| Tcm            | NFATC3       | 210556_at   | 4775   | ENSG00000072736 |
| Tcm            | LOC202134    | 215133_s.at | 202134 | ENSG00000182230 |
| Tcm            | TIMM8A       | 210800_at   | 1678   | ENSG00000126953 |
| Tcm            | ATF7IP       | 216197_at   | 55729  | ENSG00000171681 |
| Tcm            | REPS1        | 215201_at   | 85021  | ENSG00000135597 |
| Tcm            | PSPC1        | 215083_at   | 55269  | ENSG00000121390 |
| Tcm            | RPP38        | 215743_at   | 9397   | ENSG00000152465 |
| Tcm            | HNRPH1       | 213472_at   | 3187   | ENSG00000169045 |
| Tcm            | STX16        | 221638_s.at | 8675   | ENSG00000124222 |
| Tcm            | CYLD         | 214272_at   | 1540   | ENSG00000083799 |
| Tcm            | SNRPN        | 216850_at   | 6638   | ENSG00000128739 |
| Tcm            | TRAF3IP3     | 215275_at   | 80342  | ENSG00000009790 |
| Tcm            | NEFL         | 221805_at   | 4747   | ENSG00000277586 |
| Tcm            | POLR2J2      | 217610_at   | 246721 | ENSG00000228049 |
| Tcm            | AQP3         | 203747_at   | 360    | ENSG00000165272 |
| Tcm            | CG030        | 215105_at   | 116828 | ENSG00000281026 |
| Tcm            | PDXDC2       | 215920_s.at | 283970 | ENSG00000196696 |
| Tcm            | CLUAP1       | 204576_s.at | 23059  | ENSG00000103351 |
| Tcm            | DOCK9        | 215041_s.at | 23348  | ENSG00000088387 |
| Tcm            | CYorf15B     | 214131_at   | 84663  | NaN             |
| Tcm            | CREBZF       | 213584_s.at | 58487  | ENSG00000137504 |
| Tcm            | CEP68        | 207971_s.at | 23177  | ENSG00000011523 |
| Tcm            | TXK          | 206828_at   | 7294   | ENSG00000074966 |
| Tcm            | SLC7A6       | 203578_s.at | 9057   | ENSG00000103064 |
| Tcm            | FYB          | 205285_s.at | 2533   | ENSG00000082074 |
| Tcm            | MAP3K1       | 214786_at   | 4214   | ENSG00000095015 |
| Tem            | TRA@         | 217397_at   | 6955   | NaN             |
| Tem            | PRKY         | 206279_at   | 5616   | ENSG00000099725 |
| Tem            | VIL2         | 217230_at   | 7430   | ENSG00000092820 |
| Tem            | GDPD5        | 32502_at    | 81544  | ENSG00000158555 |
| Tem            | CCR2         | 206978_at   | 1231   | NaN             |
| Tem            | MEFV         | 208262_x.at | 4210   | ENSG00000103313 |
| Tem            | C7orf54      | 210109_at   | 27099  | ENSG00000279078 |
| Tem            | FLI1         | 210786_s.at | 2313   | ENSG00000151702 |
| Tem            | TBC1D5       | 201815_s.at | 9779   | ENSG00000131374 |
| Tem            | DDX17        | 208719_s.at | 10521  | ENSG00000100201 |
| Tem            | AKT3         | 212609_s.at | 10000  | ENSG00000275199 |
| Tem            | AKT3         | 212609_s.at | 10000  | ENSG00000117020 |

|           |         |             |       |                 |
|-----------|---------|-------------|-------|-----------------|
| Tem       | EWSR1   | 211825_s_at | 2130  | ENSG00000182944 |
| Tem       | TBCD    | 201759_at   | 6904  | ENSG00000278759 |
| Tem       | TBCD    | 201759_at   | 6904  | ENSG00000141556 |
| Tem       | CCR2    | 207794_at   | 1231  | NaN             |
| Tem       | NFATC4  | 205897_at   | 4776  | ENSG00000100968 |
| Tem       | LTK     | 207106_s_at | 4058  | ENSG00000062524 |
| Th1 cells | IFNG    | 210354_at   | 3458  | ENSG00000111537 |
| Th1 cells | LTA     | 206975_at   | 4049  | ENSG00000238130 |
| Th1 cells | LTA     | 206975_at   | 4049  | ENSG00000173503 |
| Th1 cells | LTA     | 206975_at   | 4049  | ENSG00000231408 |
| Th1 cells | LTA     | 206975_at   | 4049  | ENSG00000226979 |
| Th1 cells | LTA     | 206975_at   | 4049  | ENSG00000230279 |
| Th1 cells | LTA     | 206975_at   | 4049  | ENSG00000226275 |
| Th1 cells | LTA     | 206975_at   | 4049  | ENSG00000223919 |
| Th1 cells | APBB2   | 213419_at   | 323   | ENSG00000163697 |
| Th1 cells | DOK5    | 214844_s_at | 55816 | ENSG00000101134 |
| Th1 cells | IL12RB2 | 206999_at   | 3595  | ENSG00000081985 |
| Th1 cells | APBB2   | 40148_at    | 323   | ENSG00000163697 |
| Th1 cells | APOD    | 201525_at   | 347   | ENSG00000189058 |
| Th1 cells | ZBTB32  | 220118_at   | 27033 | ENSG00000011590 |
| Th1 cells | CD38    | 205692_s_at | 952   | ENSG00000004468 |
| Th1 cells | CSF2    | 210229_s_at | 1437  | ENSG00000164400 |
| Th1 cells | CTLA4   | 221331_x_at | 1493  | ENSG00000163599 |
| Th1 cells | CD70    | 206508_at   | 970   | ENSG00000125726 |
| Th1 cells | DPP4    | 211478_s_at | 1803  | ENSG00000197635 |
| Th1 cells | EGFL6   | 219454_at   | 25975 | ENSG00000198759 |
| Th1 cells | BST2    | 201641_at   | 684   | ENSG00000130303 |
| Th1 cells | DUSP5   | 209457_at   | 1847  | ENSG00000138166 |
| Th1 cells | LRP8    | 205282_at   | 7804  | ENSG00000157193 |
| Th1 cells | IL22    | 221165_s_at | 50616 | ENSG00000127318 |
| Th1 cells | DGKI    | 206806_at   | 9162  | ENSG00000157680 |
| Th1 cells | CCL4    | 204103_at   | 6351  | ENSG00000275824 |
| Th1 cells | CCL4    | 204103_at   | 6351  | ENSG00000275302 |
| Th1 cells | CCL4    | 204103_at   | 6351  | ENSG00000277943 |
| Th1 cells | DPP4    | 203716_s_at | 1803  | ENSG00000197635 |
| Th1 cells | GGT1    | 211417_x_at | 2678  | ENSG00000100031 |
| Th1 cells | LRRN3   | 209840_s_at | 54674 | ENSG00000173114 |
| Th1 cells | SYNGR3  | 205691_at   | 9143  | ENSG00000127561 |
| Th1 cells | ATP9A   | 212062_at   | 10079 | ENSG00000054793 |
| Th1 cells | BTG3    | 205548_s_at | 10950 | ENSG00000281484 |
| Th1 cells | BTG3    | 205548_s_at | 10950 | ENSG00000154640 |
| Th1 cells | CMAH    | 210571_s_at | 8418  | NaN             |
| Th1 cells | HBEGF   | 38037_at    | 1839  | ENSG00000113070 |
| Th1 cells | SGCB    | 205120_s_at | 6443  | ENSG00000163069 |
| Th2 cells | PMCH    | 206942_s_at | 5367  | ENSG00000183395 |
| Th2 cells | AHI1    | 220841_s_at | 54806 | ENSG00000135541 |
| Th2 cells | PTGIS   | 208131_s_at | 5740  | ENSG00000124212 |
| Th2 cells | AHI1    | 220842_at   | 54806 | ENSG00000135541 |
| Th2 cells | CXCR6   | 211469_s_at | 10663 | ENSG00000172215 |
| Th2 cells | EVI5    | 209717_at   | 7813  | ENSG00000067208 |
| Th2 cells | AHI1    | 221569_at   | 54806 | ENSG00000135541 |
| Th2 cells | IL26    | 221111_at   | 55801 | ENSG00000111536 |
| Th2 cells | MB      | 204179_at   | 4151  | ENSG00000198125 |
| Th2 cells | NEIL3   | 219502_at   | 55247 | ENSG00000109674 |

|           |          |             |        |                 |
|-----------|----------|-------------|--------|-----------------|
| Th2 cells | GSTA4    | 202967_at   | 2941   | ENSG00000170899 |
| Th2 cells | PHOX     | 210617_at   | 5251   | ENSG00000102174 |
| Th2 cells | SMAD2    | 203076_s_at | 4087   | ENSG00000175387 |
| Th2 cells | CENPF    | 209172_s_at | 1063   | ENSG00000117724 |
| Th2 cells | ANK1     | 208353_x_at | 286    | ENSG0000029534  |
| Th2 cells | ADCY1    | 213245_at   | 107    | ENSG00000164742 |
| Th2 cells | AI582773 | 214373_at   | 728210 | NaN             |
| Th2 cells | LAIR2    | 207509_s_at | 3904   | ENSG00000277335 |
| Th2 cells | LAIR2    | 207509_s_at | 3904   | ENSG00000274084 |
| Th2 cells | LAIR2    | 207509_s_at | 3904   | ENSG00000167618 |
| Th2 cells | LAIR2    | 207509_s_at | 3904   | ENSG00000275819 |
| Th2 cells | SNRPD1   | 202691_at   | 6632   | ENSG00000167088 |
| Th2 cells | CXCR6    | 206974_at   | 10663  | ENSG00000172215 |
| Th2 cells | MICAL2   | 212472_at   | 9645   | ENSG00000133816 |
| Th2 cells | DHFR     | 202534_x_at | 1719   | ENSG00000228716 |
| Th2 cells | SMAD2    | 203077_s_at | 4087   | ENSG00000175387 |
| Th2 cells | WDHD1    | 204728_s_at | 11169  | ENSG00000198554 |
| Th2 cells | BIRC5    | 210334_x_at | 332    | ENSG00000089685 |
| Th2 cells | DHFR     | 48808_at    | 1719   | ENSG00000228716 |
| Th2 cells | SLC39A14 | 212110_at   | 23516  | ENSG00000104635 |
| Th2 cells | HELLS    | 220085_at   | 3070   | ENSG00000119969 |
| Th2 cells | LIMA1    | 217892_s_at | 51474  | ENSG00000050405 |
| Th2 cells | CDC25C   | 205167_s_at | 995    | ENSG00000158402 |
| Th2 cells | CDC7     | 204510_at   | 8317   | ENSG00000097046 |
| Th2 cells | GATA3    | 209602_s_at | 2625   | ENSG00000107485 |
| TFH       | CHI3L2   | 213060_s_at | 1117   | ENSG00000064886 |
| TFH       | CXCL13   | 205242_at   | 10563  | ENSG00000156234 |
| TFH       | MYO7A    | 33197_at    | 4647   | ENSG00000137474 |
| TFH       | CHGB     | 204260_at   | 1114   | ENSG00000089199 |
| TFH       | MYO7A    | 208189_s_at | 4647   | ENSG00000137474 |
| TFH       | ICA1     | 210547_x_at | 3382   | ENSG00000003147 |
| TFH       | HEY1     | 218839_at   | 23462  | ENSG00000164683 |
| TFH       | CDK5R1   | 204995_at   | 8851   | ENSG00000176749 |
| TFH       | ST8SIA1  | 210073_at   | 6489   | ENSG00000111728 |
| TFH       | PDCD1    | 207634_at   | 5133   | ENSG00000276977 |
| TFH       | PDCD1    | 207634_at   | 5133   | ENSG00000188389 |
| TFH       | BLR1     | 216734_s_at | 643    | ENSG00000160683 |
| TFH       | KIAA1324 | 221874_at   | 57535  | ENSG00000116299 |
| TFH       | PVALB    | 205336_at   | 5816   | ENSG00000100362 |
| TFH       | PVALB    | 205336_at   | 5816   | ENSG00000274665 |
| TFH       | ICA1     | 207949_s_at | 3382   | ENSG00000003147 |
| TFH       | TSHR     | 210055_at   | 7253   | ENSG00000165409 |
| TFH       | C18orf1  | 209574_s_at | 753    | ENSG00000168675 |
| TFH       | HEY1     | 44783_s_at  | 23462  | ENSG00000164683 |
| TFH       | TOX      | 204529_s_at | 9760   | ENSG00000198846 |
| TFH       | BLR1     | 206126_at   | 643    | ENSG00000160683 |
| TFH       | SLC7A10  | 220868_s_at | 56301  | ENSG00000130876 |
| TFH       | SMAD1    | 210993_s_at | 4086   | ENSG00000170365 |
| TFH       | POMT1    | 218476_at   | 10585  | ENSG00000130714 |
| TFH       | PASK     | 216945_x_at | 23178  | ENSG00000115687 |
| TFH       | MKL2     | 218259_at   | 57496  | ENSG00000186260 |
| TFH       | PTPN13   | 204201_s_at | 5783   | ENSG00000163629 |
| TFH       | PASK     | 213534_s_at | 23178  | ENSG00000115687 |
| TFH       | KCNK5    | 219615_s_at | 8645   | ENSG00000164626 |

|             |          |             |       |                 |
|-------------|----------|-------------|-------|-----------------|
| TFH         | C18orf1  | 207996_s_at | 753   | ENSG00000168675 |
| TFH         | ZNF764   | 57516_at    | 92595 | ENSG00000169951 |
| TFH         | MAF      | 206363_at   | 4094  | ENSG00000178573 |
| TFH         | MYO6     | 210480_s_at | 4646  | ENSG00000196586 |
| TFH         | SIRPG    | 220485_s_at | 55423 | ENSG00000089012 |
| TFH         | THADA    | 54632_at    | 63892 | ENSG00000115970 |
| TFH         | THADA    | 220212_s_at | 63892 | ENSG00000115970 |
| TFH         | MAGEH1   | 218573_at   | 28986 | ENSG00000187601 |
| TFH         | B3GAT1   | 219521_at   | 27087 | ENSG00000109956 |
| TFH         | MAF      | 209348_s_at | 4094  | ENSG00000178573 |
| TFH         | SH3TC1   | 219256_s_at | 54436 | ENSG00000125089 |
| TFH         | HIST1H4K | 214463_x_at | 8362  | ENSG00000273542 |
| TFH         | STK39    | 202786_at   | 27347 | ENSG00000198648 |
| Th17 cells  | IL17A    | 208402_at   | 3605  | ENSG00000112115 |
| Th17 cells  | IL17A    | 216876_s_at | 3605  | ENSG00000112115 |
| Th17 cells  | IL17RA   | 205707_at   | 23765 | ENSG00000177663 |
| Th17 cells  | RORC     | 206419_at   | 6097  | ENSG00000143365 |
| TReg        | FOXP3    | 221333_at   | 50943 | ENSG00000049768 |
| TReg        | FOXP3    | 221334_s_at | 50943 | ENSG00000049768 |
| CD8 T cells | CD8B     | 207979_s_at | 926   | ENSG00000172116 |
| CD8 T cells | CD8A     | 205758_at   | 925   | ENSG00000153563 |
| CD8 T cells | CD8B     | 215332_s_at | 926   | ENSG00000172116 |
| CD8 T cells | PF4      | 206390_x_at | 5196  | ENSG00000163737 |
| CD8 T cells | PRR5     | 47069_at    | 55615 | ENSG00000186654 |
| CD8 T cells | SF1      | 210172_at   | 7536  | ENSG00000168066 |
| CD8 T cells | LIME1    | 219541_at   | 54923 | ENSG00000203896 |
| CD8 T cells | DNAJB1   | 200664_s_at | 3337  | ENSG00000132002 |
| CD8 T cells | ARHGAP8  | 219168_s_at | 55615 | ENSG00000186654 |
| CD8 T cells | GZMM     | 207460_at   | 3004  | ENSG00000197540 |
| CD8 T cells | SLC16A7  | 207057_at   | 9194  | ENSG00000118596 |
| CD8 T cells | SFRS7    | 213649_at   | 6432  | ENSG00000115875 |
| CD8 T cells | APBA2    | 209871_s_at | 321   | ENSG00000034053 |
| CD8 T cells | APBA2    | 209871_s_at | 321   | ENSG00000276495 |
| CD8 T cells | C4orf15  | 210054_at   | 79441 | ENSG00000214367 |
| CD8 T cells | LEPROTL1 | 202595_s_at | 23484 | ENSG00000104660 |
| CD8 T cells | ZFP36L2  | 201367_s_at | 678   | ENSG00000152518 |
| CD8 T cells | GADD45A  | 203725_at   | 1647  | ENSG00000116717 |
| CD8 T cells | ZFP36L2  | 201369_s_at | 678   | ENSG00000152518 |
| CD8 T cells | MYST3    | 216361_s_at | 7994  | ENSG00000083168 |
| CD8 T cells | ZEB1     | 208078_s_at | 6935  | ENSG00000148516 |
| CD8 T cells | ZNF609   | 212620_at   | 23060 | ENSG00000180357 |
| CD8 T cells | C12orf47 | 64432_at    | 51275 | ENSG00000234608 |
| CD8 T cells | THUMPD1  | 206555_s_at | 55623 | ENSG00000066654 |
| CD8 T cells | VAMP2    | 201557_at   | 6844  | ENSG00000220205 |
| CD8 T cells | ZNF91    | 206059_at   | 7644  | ENSG00000167232 |
| CD8 T cells | ZNF22    | 218006_s_at | 7570  | ENSG00000165512 |
| CD8 T cells | TMC6     | 214958_s_at | 11322 | ENSG00000141524 |
| CD8 T cells | DNAJB1   | 200666_s_at | 3337  | ENSG00000132002 |
| CD8 T cells | FLT3LG   | 210607_at   | 2323  | ENSG00000090554 |
| CD8 T cells | CDKN2AIP | 218929_at   | 55602 | ENSG00000168564 |
| CD8 T cells | TSC22D3  | 207001_x_at | 1831  | ENSG00000157514 |
| CD8 T cells | TBCC     | 202495_at   | 6903  | ENSG00000124659 |
| CD8 T cells | RBM3     | 208319_s_at | 5935  | ENSG00000102317 |
| CD8 T cells | ABT1     | 218405_at   | 29777 | ENSG00000146109 |

|                 |             |             |        |                 |
|-----------------|-------------|-------------|--------|-----------------|
| CD8 T cells     | C19orf6     | 212574_x.at | 91304  | ENSG00000182087 |
| CD8 T cells     | CAMLG       | 203538_at   | 819    | ENSG00000164615 |
| CD8 T cells     | PPP1R2      | 202165_at   | 5504   | ENSG00000184203 |
| CD8 T cells     | AES         | 217729_s.at | 166    | ENSG00000104964 |
| CD8 T cells     | KLF9        | 203543_s.at | 687    | ENSG00000119138 |
| CD8 T cells     | PRF1        | 214617_at   | 5551   | ENSG00000180644 |
| Tgd             | TRD@        | 217143_s.at | 6964   | NaN             |
| Tgd             | TARP        | 211144_x.at | 445347 | ENSG00000211689 |
| Tgd             | C1orf61     | 205103_at   | 10485  | ENSG00000125462 |
| Tgd             | TRGV9       | 209813_x.at | 6983   | NaN             |
| Tgd             | CD160       | 207840_at   | 11126  | ENSG00000117281 |
| Tgd             | TARP        | 216920_s.at | 445347 | ENSG00000211689 |
| Tgd             | FEZ1        | 203562_at   | 9638   | ENSG00000149557 |
| Cytotoxic cells | KLRD1       | 210606_x.at | 3824   | ENSG00000134539 |
| Cytotoxic cells | KLRF1       | 220646_s.at | 51348  | ENSG00000150045 |
| Cytotoxic cells | GPLY        | 37145_at    | 10578  | ENSG00000115523 |
| Cytotoxic cells | GPLY        | 205495_s.at | 10578  | ENSG00000115523 |
| Cytotoxic cells | CTSW        | 214450_at   | 1521   | ENSG00000172543 |
| Cytotoxic cells | KLRB1       | 214470_at   | 3820   | ENSG00000111796 |
| Cytotoxic cells | KLRD1       | 207795_s.at | 3824   | ENSG00000134539 |
| Cytotoxic cells | KLRK1       | 205821_at   | 22914  | ENSG00000213809 |
| Cytotoxic cells | NKG7        | 213915_at   | 4818   | ENSG00000105374 |
| Cytotoxic cells | GZMH        | 210321_at   | 2999   | ENSG00000100450 |
| Cytotoxic cells | KLRD1       | 207796_x.at | 3824   | ENSG00000134539 |
| Cytotoxic cells | SIGIRR      | 218921_at   | 59307  | ENSG00000185187 |
| Cytotoxic cells | ZBTB16      | 205883_at   | 7704   | ENSG00000109906 |
| Cytotoxic cells | RUNX3       | 204198_s.at | 864    | ENSG0000020633  |
| Cytotoxic cells | APOL3       | 221087_s.at | 80833  | ENSG00000128284 |
| Cytotoxic cells | RORA        | 210426_x.at | 6095   | ENSG00000069667 |
| Cytotoxic cells | APBA2       | 209870_s.at | 321    | ENSG00000034053 |
| Cytotoxic cells | APBA2       | 209870_s.at | 321    | ENSG00000276495 |
| Cytotoxic cells | SIGIRR      | 52940_at    | 59307  | ENSG00000185187 |
| Cytotoxic cells | WHDC1L1     | 213908_at   | 339005 | NaN             |
| Cytotoxic cells | DUSP2       | 204794_at   | 1844   | ENSG00000158050 |
| Cytotoxic cells | GZMA        | 205488_at   | 3001   | ENSG00000145649 |
| NK cells        | LOC643313   | 211050_x.at | 643313 | NaN             |
| NK cells        | GAGE2       | 207739_s.at | 2574   | ENSG00000236362 |
| NK cells        | ZNF747      | 206180_x.at | 65988  | ENSG00000169955 |
| NK cells        | XCL1        | 206366_x.at | 6375   | ENSG00000143184 |
| NK cells        | XCL2        | 214567_s.at | 6846   | ENSG00000143185 |
| NK cells        | AF107846    | 217058_at   | 2778   | ENSG00000087460 |
| NK cells        | SLC30A5     | 220181_x.at | 64924  | ENSG00000145740 |
| NK cells        | NM_014114   | 220691_at   | 259230 | ENSG00000198964 |
| NK cells        | MCM3AP      | 215582_x.at | 8888   | ENSG00000160294 |
| NK cells        | TBXA2R      | 207555_s.at | 6915   | ENSG00000006638 |
| NK cells        | CDC5L       | 209057_x.at | 988    | ENSG00000096401 |
| NK cells        | LOC730096   | 215182_x.at | 730096 | NaN             |
| NK cells        | FUT5        | 211225_at   | 2527   | ENSG00000130383 |
| NK cells        | FGF18       | 206986_at   | 8817   | ENSG00000156427 |
| NK cells        | MRC2        | 209280_at   | 9902   | ENSG00000011028 |
| NK cells        | RP5-886K2.1 | 208014_x.at | 27308  | NaN             |
| NK cells        | SPN         | 216981_x.at | 6693   | ENSG00000197471 |
| NK cells        | PSMD4       | 210459_at   | 5710   | ENSG00000159352 |
| NK cells        | PRX         | 220024_s.at | 57716  | ENSG00000105227 |

|          |           |             |       |                 |
|----------|-----------|-------------|-------|-----------------|
| NK cells | FZR1      | 209415_at   | 51343 | ENSG00000105325 |
| NK cells | ZNF205    | 206416_at   | 7755  | ENSG00000122386 |
| NK cells | AL080130  | 212972_x_at | 323   | ENSG00000163697 |
| NK cells | ZNF528    | 215019_x_at | 84436 | ENSG00000167555 |
| NK cells | MAPRE3    | 203842_s_at | 22924 | ENSG00000084764 |
| NK cells | BCL2      | 207004_at   | 596   | ENSG00000171791 |
| NK cells | NM_017616 | 221068_at   | 25959 | ENSG00000197256 |
| NK cells | ARL6IP2   | 217580_x_at | 64225 | ENSG00000119787 |
| NK cells | SPN       | 206057_x_at | 6693  | ENSG00000197471 |
| NK cells | FZR1      | 211865_s_at | 51343 | ENSG00000105325 |
| NK cells | PDLIM4    | 214174_s_at | 8572  | ENSG00000131435 |
| NK cells | NM_014274 | 206827_s_at | 55503 | ENSG00000165125 |
| NK cells | NM_014274 | 206827_s_at | 55503 | ENSG00000276971 |
| NK cells | LDB3      | 216888_at   | 11155 | ENSG00000122367 |
| NK cells | ADARB1    | 209979_at   | 104   | ENSG00000197381 |
| NK cells | SMEK1     | 215607_x_at | 55671 | ENSG00000100796 |
| NK cells | TCTN2     | 206438_x_at | 79867 | ENSG00000168778 |
| NK cells | TINAGL1   | 219058_x_at | 64129 | ENSG00000142910 |
| NK cells | IGFBP5    | 203426_s_at | 3488  | ENSG00000115461 |
| NK cells | ALDH1B1   | 209646_x_at | 219   | ENSG00000137124 |
| NK cells | NCR1      | 217095_x_at | 9437  | ENSG00000278362 |
| NK cells | NCR1      | 217095_x_at | 9437  | ENSG00000275156 |
| NK cells | NCR1      | 217095_x_at | 9437  | ENSG00000277442 |
| NK cells | NCR1      | 217095_x_at | 9437  | ENSG00000276450 |
| NK cells | NCR1      | 217095_x_at | 9437  | ENSG00000278025 |
| NK cells | NCR1      | 217095_x_at | 9437  | ENSG00000189430 |
| NK cells | NCR1      | 217095_x_at | 9437  | ENSG00000275521 |
| NK cells | NCR1      | 217095_x_at | 9437  | ENSG00000277334 |
| NK cells | NCR1      | 217095_x_at | 9437  | ENSG00000275637 |
| NK cells | NCR1      | 217095_x_at | 9437  | ENSG00000273535 |
| NK cells | NCR1      | 217095_x_at | 9437  | ENSG00000277824 |
| NK cells | NCR1      | 217095_x_at | 9437  | ENSG00000275822 |
| NK cells | NCR1      | 217095_x_at | 9437  | ENSG00000274053 |
| NK cells | NCR1      | 217095_x_at | 9437  | ENSG00000273506 |
| NK cells | NCR1      | 217095_x_at | 9437  | ENSG00000277629 |
| NK cells | NCR1      | 217095_x_at | 9437  | ENSG00000273916 |
| NK cells | NCR1      | 217095_x_at | 9437  | ENSG00000284113 |
| NK cells | NCR1      | 217095_x_at | 9437  | ENSG00000284208 |
| NK cells | NCR1      | 217088_s_at | 9437  | ENSG00000278362 |
| NK cells | NCR1      | 217088_s_at | 9437  | ENSG00000275156 |
| NK cells | NCR1      | 217088_s_at | 9437  | ENSG00000277442 |
| NK cells | NCR1      | 217088_s_at | 9437  | ENSG00000276450 |
| NK cells | NCR1      | 217088_s_at | 9437  | ENSG00000278025 |
| NK cells | NCR1      | 217088_s_at | 9437  | ENSG00000189430 |
| NK cells | NCR1      | 217088_s_at | 9437  | ENSG00000275521 |
| NK cells | NCR1      | 217088_s_at | 9437  | ENSG00000277334 |
| NK cells | NCR1      | 217088_s_at | 9437  | ENSG00000275637 |
| NK cells | NCR1      | 217088_s_at | 9437  | ENSG00000273535 |
| NK cells | NCR1      | 217088_s_at | 9437  | ENSG00000277824 |
| NK cells | NCR1      | 217088_s_at | 9437  | ENSG00000275822 |
| NK cells | NCR1      | 217088_s_at | 9437  | ENSG00000274053 |
| NK cells | NCR1      | 217088_s_at | 9437  | ENSG00000273506 |
| NK cells | NCR1      | 217088_s_at | 9437  | ENSG00000277629 |
| NK cells | NCR1      | 217088_s_at | 9437  | ENSG00000273916 |



|                  |         |             |      |                 |
|------------------|---------|-------------|------|-----------------|
| NK cells         | NCR1    | 217088_s_at | 9437 | ENSG00000284113 |
| NK cells         | NCR1    | 217088_s_at | 9437 | ENSG00000284208 |
| NK cells         | NCR1    | 207860_at   | 9437 | ENSG00000278362 |
| NK cells         | NCR1    | 207860_at   | 9437 | ENSG00000275156 |
| NK cells         | NCR1    | 207860_at   | 9437 | ENSG00000277442 |
| NK cells         | NCR1    | 207860_at   | 9437 | ENSG00000276450 |
| NK cells         | NCR1    | 207860_at   | 9437 | ENSG00000278025 |
| NK cells         | NCR1    | 207860_at   | 9437 | ENSG00000189430 |
| NK cells         | NCR1    | 207860_at   | 9437 | ENSG00000275521 |
| NK cells         | NCR1    | 207860_at   | 9437 | ENSG00000277334 |
| NK cells         | NCR1    | 207860_at   | 9437 | ENSG00000275637 |
| NK cells         | NCR1    | 207860_at   | 9437 | ENSG00000273535 |
| NK cells         | NCR1    | 207860_at   | 9437 | ENSG00000277824 |
| NK cells         | NCR1    | 207860_at   | 9437 | ENSG00000275822 |
| NK cells         | NCR1    | 207860_at   | 9437 | ENSG00000274053 |
| NK cells         | NCR1    | 207860_at   | 9437 | ENSG00000273506 |
| NK cells         | NCR1    | 207860_at   | 9437 | ENSG00000277629 |
| NK cells         | NCR1    | 207860_at   | 9437 | ENSG00000273916 |
| NK cells         | NCR1    | 207860_at   | 9437 | ENSG00000284113 |
| NK cells         | NCR1    | 207860_at   | 9437 | ENSG00000284208 |
| NK CD56dim cells | KIR3DL2 | 207314_x_at | 3812 | ENSG00000278656 |
| NK CD56dim cells | KIR3DL2 | 207314_x_at | 3812 | ENSG00000278361 |
| NK CD56dim cells | KIR3DL2 | 207314_x_at | 3812 | ENSG00000277982 |
| NK CD56dim cells | KIR3DL2 | 207314_x_at | 3812 | ENSG00000275626 |
| NK CD56dim cells | KIR3DL2 | 207314_x_at | 3812 | ENSG00000276357 |
| NK CD56dim cells | KIR3DL2 | 207314_x_at | 3812 | ENSG00000275511 |
| NK CD56dim cells | KIR3DL2 | 207314_x_at | 3812 | ENSG00000273735 |
| NK CD56dim cells | KIR3DL2 | 207314_x_at | 3812 | ENSG00000275262 |
| NK CD56dim cells | KIR3DL2 | 207314_x_at | 3812 | ENSG00000278442 |
| NK CD56dim cells | KIR3DL2 | 207314_x_at | 3812 | ENSG00000278707 |
| NK CD56dim cells | KIR3DL2 | 207314_x_at | 3812 | ENSG00000278758 |
| NK CD56dim cells | KIR3DL2 | 207314_x_at | 3812 | ENSG00000277181 |
| NK CD56dim cells | KIR3DL2 | 207314_x_at | 3812 | ENSG00000275838 |
| NK CD56dim cells | KIR3DL2 | 207314_x_at | 3812 | ENSG00000276739 |
| NK CD56dim cells | KIR3DL2 | 207314_x_at | 3812 | ENSG00000277709 |
| NK CD56dim cells | KIR3DL2 | 207314_x_at | 3812 | ENSG00000273911 |
| NK CD56dim cells | KIR3DL2 | 207314_x_at | 3812 | ENSG00000276004 |
| NK CD56dim cells | KIR3DL2 | 207314_x_at | 3812 | ENSG00000278403 |
| NK CD56dim cells | KIR3DL2 | 207314_x_at | 3812 | ENSG00000275083 |
| NK CD56dim cells | KIR3DL2 | 207314_x_at | 3812 | ENSG00000278809 |
| NK CD56dim cells | KIR3DL2 | 207314_x_at | 3812 | ENSG00000278726 |
| NK CD56dim cells | KIR3DL2 | 207314_x_at | 3812 | ENSG00000275629 |
| NK CD56dim cells | KIR3DL2 | 207314_x_at | 3812 | ENSG00000276882 |
| NK CD56dim cells | KIR3DL2 | 207314_x_at | 3812 | ENSG00000240403 |
| NK CD56dim cells | KIR3DL2 | 207314_x_at | 3812 | ENSG00000278710 |
| NK CD56dim cells | KIR3DL2 | 207314_x_at | 3812 | ENSG00000274722 |
| NK CD56dim cells | KIR3DL2 | 207314_x_at | 3812 | ENSG00000275416 |
| NK CD56dim cells | KIR3DL2 | 207314_x_at | 3812 | ENSG00000278474 |
| NK CD56dim cells | KIR3DL2 | 207314_x_at | 3812 | ENSG00000275566 |
| NK CD56dim cells | KIR3DL2 | 207314_x_at | 3812 | ENSG00000278850 |
| NK CD56dim cells | KIR3DL2 | 207314_x_at | 3812 | ENSG00000276424 |
| NK CD56dim cells | KIR3DL2 | 207314_x_at | 3812 | ENSG00000284295 |
| NK CD56dim cells | KIR3DL2 | 207314_x_at | 3812 | ENSG00000284384 |
| NK CD56dim cells | KIR3DL2 | 207314_x_at | 3812 | ENSG00000284466 |

|                  |         |             |       |                 |
|------------------|---------|-------------|-------|-----------------|
| NK CD56dim cells | KIR3DL2 | 207314_x_at | 3812  | ENSG00000284101 |
| NK CD56dim cells | KIR3DL2 | 207314_x_at | 3812  | ENSG00000284213 |
| NK CD56dim cells | KIR3DL2 | 207314_x_at | 3812  | ENSG00000284046 |
| NK CD56dim cells | KIR3DL2 | 207314_x_at | 3812  | ENSG00000284063 |
| NK CD56dim cells | KIR3DL2 | 207314_x_at | 3812  | ENSG00000283975 |
| NK CD56dim cells | KIR3DL2 | 207314_x_at | 3812  | ENSG00000284528 |
| NK CD56dim cells | KIR3DL2 | 207314_x_at | 3812  | ENSG00000284053 |
| NK CD56dim cells | KIR3DL2 | 207314_x_at | 3812  | ENSG00000284192 |
| NK CD56dim cells | KIR3DL2 | 207314_x_at | 3812  | ENSG00000283951 |
| NK CD56dim cells | KIR3DL2 | 216907_x_at | 3812  | ENSG00000278656 |
| NK CD56dim cells | KIR3DL2 | 216907_x_at | 3812  | ENSG00000278361 |
| NK CD56dim cells | KIR3DL2 | 216907_x_at | 3812  | ENSG00000277982 |
| NK CD56dim cells | KIR3DL2 | 216907_x_at | 3812  | ENSG00000275626 |
| NK CD56dim cells | KIR3DL2 | 216907_x_at | 3812  | ENSG00000276357 |
| NK CD56dim cells | KIR3DL2 | 216907_x_at | 3812  | ENSG00000275511 |
| NK CD56dim cells | KIR3DL2 | 216907_x_at | 3812  | ENSG00000273735 |
| NK CD56dim cells | KIR3DL2 | 216907_x_at | 3812  | ENSG00000275262 |
| NK CD56dim cells | KIR3DL2 | 216907_x_at | 3812  | ENSG00000278442 |
| NK CD56dim cells | KIR3DL2 | 216907_x_at | 3812  | ENSG00000278707 |
| NK CD56dim cells | KIR3DL2 | 216907_x_at | 3812  | ENSG00000278758 |
| NK CD56dim cells | KIR3DL2 | 216907_x_at | 3812  | ENSG00000277181 |
| NK CD56dim cells | KIR3DL2 | 216907_x_at | 3812  | ENSG00000275838 |
| NK CD56dim cells | KIR3DL2 | 216907_x_at | 3812  | ENSG00000276739 |
| NK CD56dim cells | KIR3DL2 | 216907_x_at | 3812  | ENSG00000277709 |
| NK CD56dim cells | KIR3DL2 | 216907_x_at | 3812  | ENSG00000273911 |
| NK CD56dim cells | KIR3DL2 | 216907_x_at | 3812  | ENSG00000276004 |
| NK CD56dim cells | KIR3DL2 | 216907_x_at | 3812  | ENSG00000278403 |
| NK CD56dim cells | KIR3DL2 | 216907_x_at | 3812  | ENSG00000275083 |
| NK CD56dim cells | KIR3DL2 | 216907_x_at | 3812  | ENSG00000278809 |
| NK CD56dim cells | KIR3DL2 | 216907_x_at | 3812  | ENSG00000278726 |
| NK CD56dim cells | KIR3DL2 | 216907_x_at | 3812  | ENSG00000275629 |
| NK CD56dim cells | KIR3DL2 | 216907_x_at | 3812  | ENSG00000276882 |
| NK CD56dim cells | KIR3DL2 | 216907_x_at | 3812  | ENSG00000240403 |
| NK CD56dim cells | KIR3DL2 | 216907_x_at | 3812  | ENSG00000278710 |
| NK CD56dim cells | KIR3DL2 | 216907_x_at | 3812  | ENSG00000274722 |
| NK CD56dim cells | KIR3DL2 | 216907_x_at | 3812  | ENSG00000275416 |
| NK CD56dim cells | KIR3DL2 | 216907_x_at | 3812  | ENSG00000278474 |
| NK CD56dim cells | KIR3DL2 | 216907_x_at | 3812  | ENSG00000275566 |
| NK CD56dim cells | KIR3DL2 | 216907_x_at | 3812  | ENSG00000278850 |
| NK CD56dim cells | KIR3DL2 | 216907_x_at | 3812  | ENSG00000276424 |
| NK CD56dim cells | KIR3DL2 | 216907_x_at | 3812  | ENSG00000284295 |
| NK CD56dim cells | KIR3DL2 | 216907_x_at | 3812  | ENSG00000284384 |
| NK CD56dim cells | KIR3DL2 | 216907_x_at | 3812  | ENSG00000284466 |
| NK CD56dim cells | KIR3DL2 | 216907_x_at | 3812  | ENSG00000284101 |
| NK CD56dim cells | KIR3DL2 | 216907_x_at | 3812  | ENSG00000284213 |
| NK CD56dim cells | KIR3DL2 | 216907_x_at | 3812  | ENSG00000284046 |
| NK CD56dim cells | KIR3DL2 | 216907_x_at | 3812  | ENSG00000284063 |
| NK CD56dim cells | KIR3DL2 | 216907_x_at | 3812  | ENSG00000283975 |
| NK CD56dim cells | KIR3DL2 | 216907_x_at | 3812  | ENSG00000284528 |
| NK CD56dim cells | KIR3DL2 | 216907_x_at | 3812  | ENSG00000284053 |
| NK CD56dim cells | KIR3DL2 | 216907_x_at | 3812  | ENSG00000284192 |
| NK CD56dim cells | KIR3DL2 | 216907_x_at | 3812  | ENSG00000283951 |
| NK CD56dim cells | SPON2   | 218638_s_at | 10417 | ENSG00000159674 |
| NK CD56dim cells | KIR2DL3 | 208179_x_at | 3804  | ENSG00000275623 |

|                  |         |             |      |                 |
|------------------|---------|-------------|------|-----------------|
| NK CD56dim cells | KIR2DL3 | 208179_x_at | 3804 | ENSG00000275008 |
| NK CD56dim cells | KIR2DL3 | 208179_x_at | 3804 | ENSG00000274952 |
| NK CD56dim cells | KIR2DL3 | 208179_x_at | 3804 | ENSG00000276459 |
| NK CD56dim cells | KIR2DL3 | 208179_x_at | 3804 | ENSG00000277554 |
| NK CD56dim cells | KIR2DL3 | 208179_x_at | 3804 | ENSG00000276590 |
| NK CD56dim cells | KIR2DL3 | 208179_x_at | 3804 | ENSG00000274410 |
| NK CD56dim cells | KIR2DL3 | 208179_x_at | 3804 | ENSG00000275658 |
| NK CD56dim cells | KIR2DL3 | 208179_x_at | 3804 | ENSG00000274830 |
| NK CD56dim cells | KIR2DL3 | 208179_x_at | 3804 | ENSG00000278327 |
| NK CD56dim cells | KIR2DL3 | 208179_x_at | 3804 | ENSG00000274402 |
| NK CD56dim cells | KIR2DL3 | 208179_x_at | 3804 | ENSG00000277484 |
| NK CD56dim cells | KIR2DL3 | 208179_x_at | 3804 | ENSG00000277317 |
| NK CD56dim cells | KIR2DL3 | 208179_x_at | 3804 | ENSG00000273887 |
| NK CD56dim cells | KIR2DL3 | 208179_x_at | 3804 | ENSG00000243772 |
| NK CD56dim cells | KIR2DL3 | 208179_x_at | 3804 | ENSG00000274108 |
| NK CD56dim cells | KIR2DL3 | 208179_x_at | 3804 | ENSG00000273947 |
| NK CD56dim cells | KIR2DL3 | 208179_x_at | 3804 | ENSG00000277924 |
| NK CD56dim cells | KIR2DL3 | 208179_x_at | 3804 | ENSG00000278369 |
| NK CD56dim cells | KIR2DL3 | 208179_x_at | 3804 | ENSG00000276218 |
| NK CD56dim cells | KIR2DL3 | 208179_x_at | 3804 | ENSG00000284132 |
| NK CD56dim cells | KIR2DL3 | 208179_x_at | 3804 | ENSG00000284504 |
| NK CD56dim cells | KIR2DL3 | 208179_x_at | 3804 | ENSG00000284510 |
| NK CD56dim cells | KIR2DL3 | 208179_x_at | 3804 | ENSG00000283996 |
| NK CD56dim cells | KIR2DL3 | 208179_x_at | 3804 | ENSG00000283708 |
| NK CD56dim cells | KIR2DL3 | 208179_x_at | 3804 | ENSG00000283702 |
| NK CD56dim cells | KIR2DL3 | 208179_x_at | 3804 | ENSG00000283790 |
| NK CD56dim cells | KIR2DL3 | 208179_x_at | 3804 | ENSG00000284236 |
| NK CD56dim cells | KIR2DL3 | 208179_x_at | 3804 | ENSG00000284044 |
| NK CD56dim cells | KIR2DL3 | 208179_x_at | 3804 | ENSG00000284333 |
| NK CD56dim cells | KIR2DL3 | 208179_x_at | 3804 | ENSG00000284241 |
| NK CD56dim cells | GZMB    | 210164_at   | 3002 | ENSG00000100453 |
| NK CD56dim cells | KIR3DS1 | 211389_x_at | 3813 | ENSG00000274283 |
| NK CD56dim cells | KIR3DS1 | 211389_x_at | 3813 | ENSG00000275608 |
| NK CD56dim cells | KIR3DS1 | 211389_x_at | 3813 | ENSG00000276534 |
| NK CD56dim cells | KIR3DS1 | 211389_x_at | 3813 | ENSG00000275434 |
| NK CD56dim cells | KIR3DS1 | 211389_x_at | 3813 | ENSG00000276498 |
| NK CD56dim cells | KIR3DS1 | 211389_x_at | 3813 | ENSG00000275037 |
| NK CD56dim cells | KIR3DS1 | 211389_x_at | 3813 | ENSG00000274465 |
| NK CD56dim cells | KIR3DL1 | 211687_x_at | 3811 | ENSG00000274146 |
| NK CD56dim cells | KIR3DL1 | 211687_x_at | 3811 | ENSG00000277175 |
| NK CD56dim cells | KIR3DL1 | 211687_x_at | 3811 | ENSG00000274920 |
| NK CD56dim cells | KIR3DL1 | 211687_x_at | 3811 | ENSG00000278427 |
| NK CD56dim cells | KIR3DL1 | 211687_x_at | 3811 | ENSG00000278856 |
| NK CD56dim cells | KIR3DL1 | 211687_x_at | 3811 | ENSG00000273518 |
| NK CD56dim cells | KIR3DL1 | 211687_x_at | 3811 | ENSG00000276501 |
| NK CD56dim cells | KIR3DL1 | 211687_x_at | 3811 | ENSG00000277272 |
| NK CD56dim cells | KIR3DL1 | 211687_x_at | 3811 | ENSG00000274036 |
| NK CD56dim cells | KIR3DL1 | 211687_x_at | 3811 | ENSG00000274948 |
| NK CD56dim cells | KIR3DL1 | 211687_x_at | 3811 | ENSG00000275717 |
| NK CD56dim cells | KIR3DL1 | 211687_x_at | 3811 | ENSG00000275486 |
| NK CD56dim cells | KIR3DL1 | 211687_x_at | 3811 | ENSG00000276379 |
| NK CD56dim cells | KIR3DL1 | 211687_x_at | 3811 | ENSG00000275288 |
| NK CD56dim cells | KIR3DL1 | 211687_x_at | 3811 | ENSG00000275786 |
| NK CD56dim cells | KIR3DL1 | 211687_x_at | 3811 | ENSG00000167633 |

|                  |          |             |       |                 |
|------------------|----------|-------------|-------|-----------------|
| NK CD56dim cells | KIR3DL1  | 211687_x.at | 3811  | ENSG00000278368 |
| NK CD56dim cells | KIR3DL1  | 211687_x.at | 3811  | ENSG00000276423 |
| NK CD56dim cells | KIR3DL1  | 211687_x.at | 3811  | ENSG00000278079 |
| NK CD56dim cells | KIR3DL1  | 211687_x.at | 3811  | ENSG00000275545 |
| NK CD56dim cells | KIR3DL1  | 211687_x.at | 3811  | ENSG00000275659 |
| NK CD56dim cells | KIR3DL1  | 211687_x.at | 3811  | ENSG00000273775 |
| NK CD56dim cells | KIR3DL1  | 211687_x.at | 3811  | ENSG00000276329 |
| NK CD56dim cells | KIR3DL1  | 211687_x.at | 3811  | ENSG00000284426 |
| NK CD56dim cells | KIR3DL1  | 211687_x.at | 3811  | ENSG00000283954 |
| NK CD56dim cells | KIR3DL1  | 211687_x.at | 3811  | ENSG00000283729 |
| NK CD56dim cells | KIR3DL1  | 211687_x.at | 3811  | ENSG00000284589 |
| NK CD56dim cells | KIR3DL1  | 211687_x.at | 3811  | ENSG00000284177 |
| NK CD56dim cells | KIR3DL1  | 211687_x.at | 3811  | ENSG00000283731 |
| NK CD56dim cells | KIR3DL1  | 211687_x.at | 3811  | ENSG00000284093 |
| NK CD56dim cells | KIR3DL1  | 211687_x.at | 3811  | ENSG00000283827 |
| NK CD56dim cells | FLJ20699 | 216434.at   | 55020 | ENSG00000075234 |
| NK CD56dim cells | TMEMAI   | 217875_s.at | 56937 | ENSG00000124225 |
| NK CD56dim cells | KIR3DL2  | 211688_x.at | 3812  | ENSG00000278656 |
| NK CD56dim cells | KIR3DL2  | 211688_x.at | 3812  | ENSG00000278361 |
| NK CD56dim cells | KIR3DL2  | 211688_x.at | 3812  | ENSG00000277982 |
| NK CD56dim cells | KIR3DL2  | 211688_x.at | 3812  | ENSG00000275626 |
| NK CD56dim cells | KIR3DL2  | 211688_x.at | 3812  | ENSG00000276357 |
| NK CD56dim cells | KIR3DL2  | 211688_x.at | 3812  | ENSG00000275511 |
| NK CD56dim cells | KIR3DL2  | 211688_x.at | 3812  | ENSG00000273735 |
| NK CD56dim cells | KIR3DL2  | 211688_x.at | 3812  | ENSG00000275262 |
| NK CD56dim cells | KIR3DL2  | 211688_x.at | 3812  | ENSG00000278442 |
| NK CD56dim cells | KIR3DL2  | 211688_x.at | 3812  | ENSG00000278707 |
| NK CD56dim cells | KIR3DL2  | 211688_x.at | 3812  | ENSG00000278758 |
| NK CD56dim cells | KIR3DL2  | 211688_x.at | 3812  | ENSG00000277181 |
| NK CD56dim cells | KIR3DL2  | 211688_x.at | 3812  | ENSG00000275838 |
| NK CD56dim cells | KIR3DL2  | 211688_x.at | 3812  | ENSG00000276739 |
| NK CD56dim cells | KIR3DL2  | 211688_x.at | 3812  | ENSG00000277709 |
| NK CD56dim cells | KIR3DL2  | 211688_x.at | 3812  | ENSG00000273911 |
| NK CD56dim cells | KIR3DL2  | 211688_x.at | 3812  | ENSG00000276004 |
| NK CD56dim cells | KIR3DL2  | 211688_x.at | 3812  | ENSG00000278403 |
| NK CD56dim cells | KIR3DL2  | 211688_x.at | 3812  | ENSG00000275083 |
| NK CD56dim cells | KIR3DL2  | 211688_x.at | 3812  | ENSG00000278809 |
| NK CD56dim cells | KIR3DL2  | 211688_x.at | 3812  | ENSG00000278726 |
| NK CD56dim cells | KIR3DL2  | 211688_x.at | 3812  | ENSG00000275629 |
| NK CD56dim cells | KIR3DL2  | 211688_x.at | 3812  | ENSG00000276882 |
| NK CD56dim cells | KIR3DL2  | 211688_x.at | 3812  | ENSG00000240403 |
| NK CD56dim cells | KIR3DL2  | 211688_x.at | 3812  | ENSG00000278710 |
| NK CD56dim cells | KIR3DL2  | 211688_x.at | 3812  | ENSG00000274722 |
| NK CD56dim cells | KIR3DL2  | 211688_x.at | 3812  | ENSG00000275416 |
| NK CD56dim cells | KIR3DL2  | 211688_x.at | 3812  | ENSG00000278474 |
| NK CD56dim cells | KIR3DL2  | 211688_x.at | 3812  | ENSG00000275566 |
| NK CD56dim cells | KIR3DL2  | 211688_x.at | 3812  | ENSG00000278850 |
| NK CD56dim cells | KIR3DL2  | 211688_x.at | 3812  | ENSG00000276424 |
| NK CD56dim cells | KIR3DL2  | 211688_x.at | 3812  | ENSG00000284295 |
| NK CD56dim cells | KIR3DL2  | 211688_x.at | 3812  | ENSG00000284384 |
| NK CD56dim cells | KIR3DL2  | 211688_x.at | 3812  | ENSG00000284466 |
| NK CD56dim cells | KIR3DL2  | 211688_x.at | 3812  | ENSG00000284101 |
| NK CD56dim cells | KIR3DL2  | 211688_x.at | 3812  | ENSG00000284213 |
| NK CD56dim cells | KIR3DL2  | 211688_x.at | 3812  | ENSG00000284046 |

|                  |         |             |        |                 |
|------------------|---------|-------------|--------|-----------------|
| NK CD56dim cells | KIR3DL2 | 211688_x_at | 3812   | ENSG00000284063 |
| NK CD56dim cells | KIR3DL2 | 211688_x_at | 3812   | ENSG00000283975 |
| NK CD56dim cells | KIR3DL2 | 211688_x_at | 3812   | ENSG00000284528 |
| NK CD56dim cells | KIR3DL2 | 211688_x_at | 3812   | ENSG00000284053 |
| NK CD56dim cells | KIR3DL2 | 211688_x_at | 3812   | ENSG00000284192 |
| NK CD56dim cells | KIR3DL2 | 211688_x_at | 3812   | ENSG00000283951 |
| NK CD56dim cells | IL21R   | 221658_s_at | 50615  | ENSG00000103522 |
| NK CD56dim cells | KIR3DL2 | 207313_x_at | 3812   | ENSG00000278656 |
| NK CD56dim cells | KIR3DL2 | 207313_x_at | 3812   | ENSG00000278361 |
| NK CD56dim cells | KIR3DL2 | 207313_x_at | 3812   | ENSG00000277982 |
| NK CD56dim cells | KIR3DL2 | 207313_x_at | 3812   | ENSG00000275626 |
| NK CD56dim cells | KIR3DL2 | 207313_x_at | 3812   | ENSG00000276357 |
| NK CD56dim cells | KIR3DL2 | 207313_x_at | 3812   | ENSG00000275511 |
| NK CD56dim cells | KIR3DL2 | 207313_x_at | 3812   | ENSG00000273735 |
| NK CD56dim cells | KIR3DL2 | 207313_x_at | 3812   | ENSG00000275262 |
| NK CD56dim cells | KIR3DL2 | 207313_x_at | 3812   | ENSG00000278442 |
| NK CD56dim cells | KIR3DL2 | 207313_x_at | 3812   | ENSG00000278707 |
| NK CD56dim cells | KIR3DL2 | 207313_x_at | 3812   | ENSG00000278758 |
| NK CD56dim cells | KIR3DL2 | 207313_x_at | 3812   | ENSG00000277181 |
| NK CD56dim cells | KIR3DL2 | 207313_x_at | 3812   | ENSG00000275838 |
| NK CD56dim cells | KIR3DL2 | 207313_x_at | 3812   | ENSG00000276739 |
| NK CD56dim cells | KIR3DL2 | 207313_x_at | 3812   | ENSG00000277709 |
| NK CD56dim cells | KIR3DL2 | 207313_x_at | 3812   | ENSG00000273911 |
| NK CD56dim cells | KIR3DL2 | 207313_x_at | 3812   | ENSG00000276004 |
| NK CD56dim cells | KIR3DL2 | 207313_x_at | 3812   | ENSG00000278403 |
| NK CD56dim cells | KIR3DL2 | 207313_x_at | 3812   | ENSG00000275083 |
| NK CD56dim cells | KIR3DL2 | 207313_x_at | 3812   | ENSG00000278809 |
| NK CD56dim cells | KIR3DL2 | 207313_x_at | 3812   | ENSG00000278726 |
| NK CD56dim cells | KIR3DL2 | 207313_x_at | 3812   | ENSG00000275629 |
| NK CD56dim cells | KIR3DL2 | 207313_x_at | 3812   | ENSG00000276882 |
| NK CD56dim cells | KIR3DL2 | 207313_x_at | 3812   | ENSG00000240403 |
| NK CD56dim cells | KIR3DL2 | 207313_x_at | 3812   | ENSG00000278710 |
| NK CD56dim cells | KIR3DL2 | 207313_x_at | 3812   | ENSG00000274722 |
| NK CD56dim cells | KIR3DL2 | 207313_x_at | 3812   | ENSG00000275416 |
| NK CD56dim cells | KIR3DL2 | 207313_x_at | 3812   | ENSG00000278474 |
| NK CD56dim cells | KIR3DL2 | 207313_x_at | 3812   | ENSG00000275566 |
| NK CD56dim cells | KIR3DL2 | 207313_x_at | 3812   | ENSG00000278850 |
| NK CD56dim cells | KIR3DL2 | 207313_x_at | 3812   | ENSG00000276424 |
| NK CD56dim cells | KIR3DL2 | 207313_x_at | 3812   | ENSG00000284295 |
| NK CD56dim cells | KIR3DL2 | 207313_x_at | 3812   | ENSG00000284384 |
| NK CD56dim cells | KIR3DL2 | 207313_x_at | 3812   | ENSG00000284466 |
| NK CD56dim cells | KIR3DL2 | 207313_x_at | 3812   | ENSG00000284101 |
| NK CD56dim cells | KIR3DL2 | 207313_x_at | 3812   | ENSG00000284213 |
| NK CD56dim cells | KIR3DL2 | 207313_x_at | 3812   | ENSG00000284046 |
| NK CD56dim cells | KIR3DL2 | 207313_x_at | 3812   | ENSG00000284063 |
| NK CD56dim cells | KIR3DL2 | 207313_x_at | 3812   | ENSG00000283975 |
| NK CD56dim cells | KIR3DL2 | 207313_x_at | 3812   | ENSG00000284528 |
| NK CD56dim cells | KIR3DL2 | 207313_x_at | 3812   | ENSG00000284053 |
| NK CD56dim cells | KIR3DL2 | 207313_x_at | 3812   | ENSG00000284192 |
| NK CD56dim cells | KIR3DL2 | 207313_x_at | 3812   | ENSG00000283951 |
| NK CD56dim cells | KIR3DL3 | 216676_x_at | 115653 | ENSG00000278490 |
| NK CD56dim cells | KIR3DL3 | 216676_x_at | 115653 | ENSG00000274763 |
| NK CD56dim cells | KIR3DL3 | 216676_x_at | 115653 | ENSG00000275513 |
| NK CD56dim cells | KIR3DL3 | 216676_x_at | 115653 | ENSG00000275062 |

|                     |         |             |        |                 |
|---------------------|---------|-------------|--------|-----------------|
| NK CD56dim cells    | KIR3DL3 | 216676_x.at | 115653 | ENSG00000278723 |
| NK CD56dim cells    | KIR3DL3 | 216676_x.at | 115653 | ENSG00000274254 |
| NK CD56dim cells    | KIR3DL3 | 216676_x.at | 115653 | ENSG00000274639 |
| NK CD56dim cells    | KIR3DL3 | 216676_x.at | 115653 | ENSG00000276086 |
| NK CD56dim cells    | KIR3DL3 | 216676_x.at | 115653 | ENSG00000274511 |
| NK CD56dim cells    | KIR3DL3 | 216676_x.at | 115653 | ENSG00000276433 |
| NK CD56dim cells    | KIR3DL3 | 216676_x.at | 115653 | ENSG00000276328 |
| NK CD56dim cells    | KIR3DL3 | 216676_x.at | 115653 | ENSG00000277620 |
| NK CD56dim cells    | KIR3DL3 | 216676_x.at | 115653 | ENSG00000274786 |
| NK CD56dim cells    | KIR3DL3 | 216676_x.at | 115653 | ENSG00000276196 |
| NK CD56dim cells    | KIR3DL3 | 216676_x.at | 115653 | ENSG00000275172 |
| NK CD56dim cells    | KIR3DL3 | 216676_x.at | 115653 | ENSG00000276572 |
| NK CD56dim cells    | KIR3DL3 | 216676_x.at | 115653 | ENSG00000276875 |
| NK CD56dim cells    | KIR3DL3 | 216676_x.at | 115653 | ENSG00000274556 |
| NK CD56dim cells    | KIR3DL3 | 216676_x.at | 115653 | ENSG00000276806 |
| NK CD56dim cells    | KIR3DL3 | 216676_x.at | 115653 | ENSG00000276084 |
| NK CD56dim cells    | KIR3DL3 | 216676_x.at | 115653 | ENSG00000274394 |
| NK CD56dim cells    | KIR3DL3 | 216676_x.at | 115653 | ENSG00000274696 |
| NK CD56dim cells    | KIR3DL3 | 216676_x.at | 115653 | ENSG00000276930 |
| NK CD56dim cells    | KIR3DL3 | 216676_x.at | 115653 | ENSG00000277028 |
| NK CD56dim cells    | KIR3DL3 | 216676_x.at | 115653 | ENSG00000277552 |
| NK CD56dim cells    | KIR3DL3 | 216676_x.at | 115653 | ENSG00000242019 |
| NK CD56dim cells    | KIR3DL3 | 216676_x.at | 115653 | ENSG00000277392 |
| NK CD56dim cells    | KIR3DL3 | 216676_x.at | 115653 | ENSG00000274480 |
| NK CD56dim cells    | KIR3DL3 | 216676_x.at | 115653 | ENSG00000275433 |
| NK CD56dim cells    | KIR3DL3 | 216676_x.at | 115653 | ENSG00000278729 |
| NK CD56dim cells    | KIR3DL3 | 216676_x.at | 115653 | ENSG00000277596 |
| NK CD56dim cells    | KIR3DL3 | 216676_x.at | 115653 | ENSG00000273502 |
| NK CD56dim cells    | KIR3DL3 | 216676_x.at | 115653 | ENSG00000274724 |
| NK CD56dim cells    | KIR3DL3 | 216676_x.at | 115653 | ENSG00000283875 |
| NK CD56dim cells    | KIR3DL3 | 216676_x.at | 115653 | ENSG00000284104 |
| NK CD56dim cells    | KIR3DL3 | 216676_x.at | 115653 | ENSG00000284371 |
| NK CD56dim cells    | KIR3DL3 | 216676_x.at | 115653 | ENSG00000283823 |
| NK CD56dim cells    | KIR3DL3 | 216676_x.at | 115653 | ENSG00000283915 |
| NK CD56dim cells    | KIR3DL3 | 216676_x.at | 115653 | ENSG00000284086 |
| NK CD56dim cells    | KIR3DL3 | 216676_x.at | 115653 | ENSG00000283966 |
| NK CD56dim cells    | KIR3DL3 | 216676_x.at | 115653 | ENSG00000284480 |
| NK CD56dim cells    | KIR3DL3 | 216676_x.at | 115653 | ENSG00000284127 |
| NK CD56dim cells    | KIR2DS5 | 208203_x.at | 3810   | ENSG00000274739 |
| NK CD56dim cells    | KIR2DS5 | 208203_x.at | 3810   | ENSG00000276676 |
| NK CD56dim cells    | KIR2DS2 | 211532_x.at | 3807   | NaN             |
| NK CD56dim cells    | GTF3C1  | 202320.at   | 2975   | ENSG00000077235 |
| NK CD56dim cells    | KIR2DS1 | 216552_x.at | 3806   | ENSG00000278304 |
| NK CD56dim cells    | KIR2DS1 | 216552_x.at | 3806   | ENSG00000273603 |
| NK CD56dim cells    | KIR2DS1 | 216552_x.at | 3806   | ENSG00000273517 |
| NK CD56dim cells    | KIR2DS1 | 216552_x.at | 3806   | ENSG00000278120 |
| NK CD56dim cells    | KIR2DS1 | 216552_x.at | 3806   | ENSG00000275421 |
| NK CD56dim cells    | KIR2DS1 | 216552_x.at | 3806   | ENSG00000275306 |
| NK CD56dim cells    | KIR2DS1 | 216552_x.at | 3806   | ENSG00000276327 |
| NK CD56dim cells    | EDG8    | 221417_x.at | 53637  | ENSG00000180739 |
| NK CD56bright cells | DUSP4   | 204014.at   | 1846   | ENSG00000120875 |
| NK CD56bright cells | RRAD    | 204803.s.at | 6236   | ENSG00000166592 |
| NK CD56bright cells | XCL1    | 206365.at   | 6375   | ENSG00000143184 |
| NK CD56bright cells | PLA2G6  | 215938.s.at | 8398   | ENSG00000184381 |

|                     |           |             |        |                 |
|---------------------|-----------|-------------|--------|-----------------|
| NK CD56bright cells | PLA2G6    | 204691_x.at | 8398   | ENSG00000184381 |
| NK CD56bright cells | NIBP      | 221672_s.at | 83696  | ENSG00000167632 |
| NK CD56bright cells | FOXJ1     | 205906.at   | 2302   | ENSG00000129654 |
| NK CD56bright cells | 03/06/09  | 215908.at   | 10299  | ENSG00000145495 |
| NK CD56bright cells | DUSP4     | 204015_s.at | 1846   | ENSG00000120875 |
| NK CD56bright cells | PLA2G6    | 210647_x.at | 8398   | ENSG00000184381 |
| NK CD56bright cells | MADD      | 38398.at    | 8567   | ENSG00000110514 |
| NK CD56bright cells | BG255923  | 215409.at   | 254531 | ENSG00000176454 |
| NK CD56bright cells | MPPED1    | 206436.at   | 758    | ENSG00000186732 |
| NK CD56bright cells | MUC3B     | 214676_x.at | 57876  | NaN             |
| DC                  | CD209     | 207277.at   | 30835  | ENSG00000090659 |
| DC                  | CCL17     | 207900.at   | 6361   | ENSG00000102970 |
| DC                  | HSD11B1   | 205404.at   | 3290   | ENSG00000117594 |
| DC                  | CCL13     | 206407_s.at | 6357   | ENSG00000181374 |
| DC                  | CCL22     | 207861.at   | 6367   | ENSG00000102962 |
| DC                  | PPFIBP2   | 212841_s.at | 8495   | ENSG00000166387 |
| DC                  | NPR1      | 32625.at    | 4881   | ENSG00000169418 |
| iDC                 | CD1B      | 206749.at   | 910    | ENSG00000158485 |
| iDC                 | VASH1     | 203940_s.at | 22846  | ENSG00000071246 |
| iDC                 | F13A1     | 203305.at   | 2162   | ENSG00000124491 |
| iDC                 | CD1E      | 215784.at   | 913    | ENSG00000158488 |
| iDC                 | MMP12     | 204580.at   | 4321   | ENSG00000262406 |
| iDC                 | FABP4     | 203980.at   | 2167   | ENSG00000170323 |
| iDC                 | CLEC10A   | 206682.at   | 10462  | ENSG00000132514 |
| iDC                 | SYT17     | 205613.at   | 51760  | ENSG00000103528 |
| iDC                 | MS4A6A    | 219666.at   | 64231  | ENSG00000110077 |
| iDC                 | CTNS      | 204925.at   | 1497   | ENSG00000040531 |
| iDC                 | GUCA1A    | 206062.at   | 2978   | ENSG00000048545 |
| iDC                 | CARD9     | 220162_s.at | 64170  | ENSG00000187796 |
| iDC                 | CD1E      | 208592_s.at | 913    | ENSG00000158488 |
| iDC                 | ABCG2     | 209735.at   | 9429   | ENSG00000118777 |
| iDC                 | CD1A      | 210325.at   | 909    | ENSG00000158477 |
| iDC                 | PPARG     | 208510_s.at | 5468   | ENSG00000132170 |
| iDC                 | RAP1GAP   | 203911.at   | 5909   | ENSG00000076864 |
| iDC                 | SLC7A8    | 216604_s.at | 23428  | ENSG00000092068 |
| iDC                 | GSTT1     | 203815.at   | 2952   | ENSG00000277656 |
| iDC                 | NM_021941 | 218019_s.at | 8566   | ENSG00000160209 |
| iDC                 | FZD2      | 210220.at   | 2535   | ENSG00000180340 |
| iDC                 | CSF1R     | 203104.at   | 1436   | ENSG00000182578 |
| iDC                 | HS3ST2    | 219697.at   | 9956   | ENSG00000122254 |
| iDC                 | CH25H     | 206932.at   | 9023   | ENSG00000138135 |
| iDC                 | LMAN2L    | 221274_s.at | 81562  | ENSG00000114988 |
| iDC                 | SLC26A6   | 221572_s.at | 65010  | ENSG00000225697 |
| iDC                 | BLVRB     | 202201.at   | 645    | ENSG00000090013 |
| iDC                 | NUDT9     | 218375.at   | 53343  | ENSG00000170502 |
| iDC                 | PREP      | 204117.at   | 5550   | ENSG00000085377 |
| iDC                 | TM7SF4    | 221266_s.at | 81501  | ENSG00000164935 |
| iDC                 | TACSTD2   | 202286_s.at | 4070   | ENSG00000184292 |
| iDC                 | CD1C      | 205987.at   | 911    | ENSG00000158481 |
| aDC                 | CCL1      | 207533.at   | 6346   | ENSG00000108702 |
| aDC                 | EBI3      | 219424.at   | 10148  | ENSG00000105246 |
| aDC                 | INDO      | 210029.at   | 3620   | ENSG00000131203 |
| aDC                 | LAMP3     | 205569.at   | 27074  | ENSG00000078081 |
| aDC                 | OAS3      | 218400.at   | 4940   | ENSG00000111331 |

|             |          |             |        |                 |
|-------------|----------|-------------|--------|-----------------|
| pDC         | IL3RA    | 206148_at   | 3563   | ENSG00000185291 |
| Eosinophils | IL5RA    | 211517_s_at | 3568   | ENSG00000091181 |
| Eosinophils | KCNH2    | 205262_at   | 3757   | ENSG00000055118 |
| Eosinophils | TKTL1    | 216370_s_at | 8277   | ENSG00000007350 |
| Eosinophils | IL5RA    | 210744_s_at | 3568   | ENSG00000091181 |
| Eosinophils | EMR1     | 207111_at   | 2015   | ENSG00000174837 |
| Eosinophils | KCNH2    | 210036_s_at | 3757   | ENSG00000055118 |
| Eosinophils | CCR3     | 208304_at   | 1232   | ENSG00000183625 |
| Eosinophils | ACACB    | 49452_at    | 32     | ENSG00000076555 |
| Eosinophils | THBS1    | 201108_s_at | 7057   | ENSG00000137801 |
| Eosinophils | GALC     | 211810_s_at | 2581   | ENSG00000054983 |
| Eosinophils | TKTL1    | 214183_s_at | 8277   | ENSG00000007350 |
| Eosinophils | RNU2     | 210230_at   | 728965 | NaN             |
| Eosinophils | CLC      | 206207_at   | 1178   | ENSG00000105205 |
| Eosinophils | THBS1    | 201109_s_at | 7057   | ENSG00000137801 |
| Eosinophils | HIST1H1C | 209398_at   | 3006   | ENSG00000187837 |
| Eosinophils | CYSLTR2  | 220813_at   | 57105  | ENSG00000152207 |
| Eosinophils | HRH4     | 221170_at   | 59340  | ENSG00000134489 |
| Eosinophils | RNASE2   | 206111_at   | 6036   | ENSG00000169385 |
| Eosinophils | CAT      | 211922_s_at | 847    | ENSG00000121691 |
| Eosinophils | LRP5L    | 214873_at   | 91355  | ENSG00000100068 |
| Eosinophils | SYNJ1    | 207594_s_at | 8867   | ENSG00000159082 |
| Eosinophils | SYNJ1    | 212990_at   | 8867   | ENSG00000159082 |
| Eosinophils | THBS4    | 204776_at   | 7060   | ENSG00000113296 |
| Eosinophils | GPR44    | 206361_at   | 11251  | ENSG00000183134 |
| Eosinophils | KBTBD11  | 204301_at   | 9920   | ENSG00000176595 |
| Eosinophils | KBTBD11  | 204301_at   | 9920   | ENSG00000273645 |
| Eosinophils | HES1     | 203394_s_at | 3280   | ENSG00000114315 |
| Eosinophils | ABHD2    | 205566_at   | 11057  | ENSG00000140526 |
| Eosinophils | TIPARP   | 212665_at   | 25976  | ENSG00000163659 |
| Eosinophils | SMPD3    | 219695_at   | 55512  | ENSG00000103056 |
| Eosinophils | MYO15B   | 59375_at    | 80022  | NaN             |
| Eosinophils | TGIF1    | 203313_s_at | 7050   | ENSG00000177426 |
| Eosinophils | RRP12    | 216360_x_at | 23223  | ENSG00000052749 |
| Eosinophils | ACACB    | 43427_at    | 32     | ENSG00000076555 |
| Eosinophils | IGSF2    | 207167_at   | 9398   | ENSG00000134256 |
| Eosinophils | HES1     | 203395_s_at | 3280   | ENSG00000114315 |
| Eosinophils | RCOR3    | 218344_s_at | 55758  | ENSG00000117625 |
| Eosinophils | EPN2     | 203463_s_at | 22905  | ENSG00000072134 |
| Eosinophils | C9orf156 | 222195_s_at | 51531  | ENSG00000136932 |
| Eosinophils | SIAH1    | 202981_x_at | 6477   | ENSG00000196470 |
| Eosinophils | ACACB    | 221928_at   | 32     | ENSG00000076555 |
| Macrophages | MARCO    | 205819_at   | 8685   | ENSG00000019169 |
| Macrophages | CXCL5    | 214974_x_at | 6374   | ENSG00000163735 |
| Macrophages | SCG5     | 203889_at   | 6447   | ENSG00000166922 |
| Macrophages | SCG5     | 203889_at   | 6447   | ENSG00000277614 |
| Macrophages | SCG5     | 203889_at   | 6447   | ENSG00000281931 |
| Macrophages | SULT1C2  | 205342_s_at | 6819   | ENSG00000198203 |
| Macrophages | SULT1C2  | 211470_s_at | 6819   | ENSG00000198203 |
| Macrophages | MSR1     | 214770_at   | 4481   | ENSG00000038945 |
| Macrophages | CTSK     | 202450_s_at | 1513   | ENSG00000143387 |
| Macrophages | PTGDS    | 212187_x_at | 5730   | ENSG00000107317 |
| Macrophages | COLEC12  | 221019_s_at | 81035  | ENSG00000158270 |
| Macrophages | GPC4     | 204984_at   | 2239   | ENSG00000076716 |



|             |           |             |        |                 |
|-------------|-----------|-------------|--------|-----------------|
| Macrophages | MSR1      | 208423.s_at | 4481   | ENSG00000038945 |
| Macrophages | PCOLCE2   | 219295.s_at | 26577  | ENSG00000163710 |
| Macrophages | CHIT1     | 208168.s_at | 1118   | ENSG00000133063 |
| Macrophages | PTGDS     | 211748.x_at | 5730   | ENSG00000107317 |
| Macrophages | KAL1      | 205206.at   | 3730   | ENSG00000011201 |
| Macrophages | CLEC5A    | 219890.at   | 23601  | ENSG00000258227 |
| Macrophages | GPC4      | 204983.s_at | 2239   | ENSG00000076716 |
| Macrophages | ME1       | 204058.at   | 4199   | ENSG00000065833 |
| Macrophages | DNASE2B   | 220380.at   | 58511  | ENSG00000137976 |
| Macrophages | CCL7      | 208075.s_at | 6354   | ENSG00000108688 |
| Macrophages | FN1       | 214701.s_at | 2335   | ENSG00000115414 |
| Macrophages | CD163     | 203645.s_at | 9332   | ENSG00000177575 |
| Macrophages | GM2A      | 215891.s_at | 2760   | ENSG00000196743 |
| Macrophages | SCARB2    | 201647.s_at | 950    | ENSG00000138760 |
| Macrophages | BCAT1     | 214452.at   | 586    | ENSG00000060982 |
| Macrophages | BCAT1     | 214390.s_at | 586    | ENSG00000060982 |
| Macrophages | RAI14     | 202052.s_at | 26064  | ENSG00000039560 |
| Macrophages | MSR1      | 211887.x_at | 4481   | ENSG00000038945 |
| Macrophages | COL8A2    | 52651.at    | 1296   | ENSG00000171812 |
| Macrophages | CD163     | 215049.x_at | 9332   | ENSG00000177575 |
| Macrophages | APOE      | 203381.s_at | 348    | ENSG00000130203 |
| Macrophages | CHI3L1    | 209396.s_at | 1116   | ENSG00000133048 |
| Macrophages | ATG7      | 218673.s_at | 10533  | ENSG00000197548 |
| Macrophages | CD84      | 211190.x_at | 8832   | ENSG00000066294 |
| Macrophages | FDX1      | 203646.at   | 2230   | ENSG00000137714 |
| Macrophages | MS4A4A    | 219607.s_at | 51338  | ENSG00000110079 |
| Macrophages | SGMS1     | 212989.at   | 259230 | ENSG00000198964 |
| Macrophages | EMP1      | 201324.at   | 2012   | ENSG00000134531 |
| Macrophages | CYBB      | 203922.s_at | 1536   | ENSG00000165168 |
| Macrophages | CD68      | 203507.at   | 968    | ENSG00000129226 |
| Mast cells  | PRG2      | 211743.s_at | 5553   | ENSG00000186652 |
| Mast cells  | CTSG      | 205653.at   | 1511   | ENSG00000100448 |
| Mast cells  | TPSAB1    | 215382.x_at | 7177   | ENSG00000172236 |
| Mast cells  | SLC18A2   | 205857.at   | 6571   | ENSG00000165646 |
| Mast cells  | TPSAB1    | 205683.x_at | 7177   | ENSG00000172236 |
| Mast cells  | MS4A2     | 207497.s_at | 2206   | ENSG00000149534 |
| Mast cells  | CPA3      | 205624.at   | 1359   | ENSG00000163751 |
| Mast cells  | TPSB2     | 207134.x_at | 64499  | ENSG00000197253 |
| Mast cells  | TPSAB1    | 216474.x_at | 7177   | ENSG00000172236 |
| Mast cells  | NM_003293 | 207741.x_at | 64499  | ENSG00000197253 |
| Mast cells  | TPSAB1    | 210084.x_at | 7177   | ENSG00000172236 |
| Mast cells  | MS4A2     | 207496.at   | 2206   | ENSG00000149534 |
| Mast cells  | TPSAB1    | 217023.x_at | 7177   | ENSG00000172236 |
| Mast cells  | GATA2     | 209710.at   | 2624   | ENSG00000179348 |
| Mast cells  | HDC       | 207067.s_at | 3067   | ENSG00000140287 |
| Mast cells  | LOH11CR2A | 210102.at   | 4013   | ENSG00000110002 |
| Mast cells  | SIGLEC6   | 210796.x_at | 946    | ENSG00000105492 |
| Mast cells  | ELA2      | 206871.at   | 1991   | ENSG00000277571 |
| Mast cells  | ELA2      | 206871.at   | 1991   | ENSG00000197561 |
| Mast cells  | LOH11CR2A | 205011.at   | 4013   | ENSG00000110002 |
| Mast cells  | CMA1      | 214533.at   | 1215   | ENSG00000092009 |
| Mast cells  | SIGLEC6   | 206520.x_at | 946    | ENSG00000105492 |
| Mast cells  | PGDS      | 206726.at   | 27306  | ENSG00000163106 |
| Mast cells  | MLPH      | 218211.s_at | 79083  | ENSG00000115648 |

|             |           |             |        |                 |
|-------------|-----------|-------------|--------|-----------------|
| Mast cells  | ADCYAP1   | 206281_at   | 116    | ENSG00000141433 |
| Mast cells  | SIGLEC6   | 206519_x_at | 946    | ENSG00000105492 |
| Mast cells  | SLC24A3   | 57588_at    | 57419  | ENSG00000185052 |
| Mast cells  | CALB2     | 205428_s_at | 794    | ENSG00000172137 |
| Mast cells  | CALB2     | 205428_s_at | 794    | ENSG00000282830 |
| Mast cells  | SLC24A3   | 219090_at   | 57419  | ENSG00000185052 |
| Mast cells  | KIT       | 205051_s_at | 3815   | ENSG00000157404 |
| Mast cells  | TAL1      | 206283_s_at | 6886   | ENSG00000162367 |
| Mast cells  | ABCC4     | 203196_at   | 10257  | ENSG00000125257 |
| Mast cells  | PPM1H     | 212686_at   | 57460  | ENSG00000111110 |
| Mast cells  | MAOB      | 204041_at   | 4129   | ENSG00000069535 |
| Mast cells  | HPGD      | 211549_s_at | 3248   | ENSG00000164120 |
| Mast cells  | SCG2      | 204035_at   | 7857   | ENSG00000171951 |
| Mast cells  | PTGS1     | 205127_at   | 5742   | ENSG00000095303 |
| Mast cells  | CEACAM8   | 206676_at   | 1088   | ENSG00000124469 |
| Mast cells  | MPO       | 203949_at   | 4353   | ENSG00000005381 |
| Mast cells  | NR0B1     | 206645_s_at | 190    | ENSG00000169297 |
| Mast cells  | LOC339524 | 215039_at   | 339524 | ENSG00000267272 |
| Neutrophils | CSF3R     | 203591_s_at | 1441   | ENSG00000119535 |
| Neutrophils | CYP4F3    | 206515_at   | 4051   | ENSG00000186529 |
| Neutrophils | VNN3      | 220528_at   | 55350  | ENSG00000093134 |
| Neutrophils | FPRL1     | 210773_s_at | 2358   | ENSG00000171049 |
| Neutrophils | KCNJ15    | 216782_at   | 3772   | ENSG00000157551 |
| Neutrophils | MME       | 203434_s_at | 4311   | ENSG00000196549 |
| Neutrophils | IL8RA     | 207094_at   | 3577   | ENSG00000163464 |
| Neutrophils | IL8RB     | 207008_at   | 3579   | ENSG00000180871 |
| Neutrophils | MME       | 203435_s_at | 4311   | ENSG00000196549 |
| Neutrophils | FCGR3B    | 204007_at   | 2215   | ENSG00000162747 |
| Neutrophils | DYSF      | 218660_at   | 8291   | ENSG00000135636 |
| Neutrophils | KCNJ15    | 211806_s_at | 3772   | ENSG00000157551 |
| Neutrophils | FCAR      | 211816_x_at | 2204   | ENSG00000278415 |
| Neutrophils | FCAR      | 211816_x_at | 2204   | ENSG00000274580 |
| Neutrophils | FCAR      | 211816_x_at | 2204   | ENSG00000275136 |
| Neutrophils | FCAR      | 211816_x_at | 2204   | ENSG00000275970 |
| Neutrophils | FCAR      | 211816_x_at | 2204   | ENSG00000276985 |
| Neutrophils | FCAR      | 211816_x_at | 2204   | ENSG00000186431 |
| Neutrophils | FCAR      | 211816_x_at | 2204   | ENSG00000276858 |
| Neutrophils | FCAR      | 211816_x_at | 2204   | ENSG00000275269 |
| Neutrophils | FCAR      | 211816_x_at | 2204   | ENSG00000273738 |
| Neutrophils | FCAR      | 211816_x_at | 2204   | ENSG00000275564 |
| Neutrophils | FCAR      | 211816_x_at | 2204   | ENSG00000283953 |
| Neutrophils | FCAR      | 211816_x_at | 2204   | ENSG00000283750 |
| Neutrophils | FCAR      | 211816_x_at | 2204   | ENSG00000284245 |
| Neutrophils | FCAR      | 211816_x_at | 2204   | ENSG00000284004 |
| Neutrophils | FCAR      | 211816_x_at | 2204   | ENSG00000284061 |
| Neutrophils | FCAR      | 211307_s_at | 2204   | ENSG00000278415 |
| Neutrophils | FCAR      | 211307_s_at | 2204   | ENSG00000274580 |
| Neutrophils | FCAR      | 211307_s_at | 2204   | ENSG00000275136 |
| Neutrophils | FCAR      | 211307_s_at | 2204   | ENSG00000275970 |
| Neutrophils | FCAR      | 211307_s_at | 2204   | ENSG00000276985 |
| Neutrophils | FCAR      | 211307_s_at | 2204   | ENSG00000186431 |
| Neutrophils | FCAR      | 211307_s_at | 2204   | ENSG00000276858 |
| Neutrophils | FCAR      | 211307_s_at | 2204   | ENSG00000275269 |
| Neutrophils | FCAR      | 211307_s_at | 2204   | ENSG00000273738 |

|                    |           |             |       |                 |
|--------------------|-----------|-------------|-------|-----------------|
| Neutrophils        | FCAR      | 211307.s_at | 2204  | ENSG00000275564 |
| Neutrophils        | FCAR      | 211307.s_at | 2204  | ENSG00000283953 |
| Neutrophils        | FCAR      | 211307.s_at | 2204  | ENSG00000283750 |
| Neutrophils        | FCAR      | 211307.s_at | 2204  | ENSG00000284245 |
| Neutrophils        | FCAR      | 211307.s_at | 2204  | ENSG00000284004 |
| Neutrophils        | FCAR      | 211307.s_at | 2204  | ENSG00000284061 |
| Neutrophils        | CEACAM3   | 210789.x_at | 1084  | ENSG00000170956 |
| Neutrophils        | FPRL1     | 210772.at   | 2358  | ENSG00000171049 |
| Neutrophils        | HIST1H2BC | 214455.at   | 8347  | ENSG00000180596 |
| Neutrophils        | HPSE      | 219403.s_at | 10855 | ENSG00000173083 |
| Neutrophils        | FLJ11151  | 218610.s_at | 55313 | ENSG00000103381 |
| Neutrophils        | CREB5     | 205931.s_at | 9586  | ENSG00000146592 |
| Neutrophils        | S100A12   | 205863.at   | 6283  | ENSG00000163221 |
| Neutrophils        | FCGR3B    | 204006.s_at | 2215  | ENSG00000162747 |
| Neutrophils        | TNFRSF10C | 211163.s_at | 8794  | ENSG00000173535 |
| Neutrophils        | SLC22A4   | 205896.at   | 6583  | ENSG00000197208 |
| Neutrophils        | KIAA0329  | 204307.at   | 9895  | ENSG00000196663 |
| Neutrophils        | SLC25A37  | 218136.s_at | 51312 | ENSG00000147454 |
| Neutrophils        | BST1      | 205715.at   | 683   | ENSG00000109743 |
| Neutrophils        | FCAR      | 207674.at   | 2204  | ENSG00000278415 |
| Neutrophils        | FCAR      | 207674.at   | 2204  | ENSG00000274580 |
| Neutrophils        | FCAR      | 207674.at   | 2204  | ENSG00000275136 |
| Neutrophils        | FCAR      | 207674.at   | 2204  | ENSG00000275970 |
| Neutrophils        | FCAR      | 207674.at   | 2204  | ENSG00000276985 |
| Neutrophils        | FCAR      | 207674.at   | 2204  | ENSG00000186431 |
| Neutrophils        | FCAR      | 207674.at   | 2204  | ENSG00000276858 |
| Neutrophils        | FCAR      | 207674.at   | 2204  | ENSG00000275269 |
| Neutrophils        | FCAR      | 207674.at   | 2204  | ENSG00000273738 |
| Neutrophils        | FCAR      | 207674.at   | 2204  | ENSG00000275564 |
| Neutrophils        | FCAR      | 207674.at   | 2204  | ENSG00000283953 |
| Neutrophils        | FCAR      | 207674.at   | 2204  | ENSG00000283750 |
| Neutrophils        | FCAR      | 207674.at   | 2204  | ENSG00000284245 |
| Neutrophils        | FCAR      | 207674.at   | 2204  | ENSG00000284004 |
| Neutrophils        | FCAR      | 207674.at   | 2204  | ENSG00000284061 |
| Neutrophils        | CEACAM3   | 208052.x_at | 1084  | ENSG00000170956 |
| Neutrophils        | CRISPLD2  | 221541.at   | 83716 | ENSG00000103196 |
| Neutrophils        | TNFRSF10C | 206222.at   | 8794  | ENSG00000173535 |
| Neutrophils        | G0S2      | 213524.s_at | 50486 | ENSG00000123689 |
| Neutrophils        | SIGLEC5   | 220000.at   | 8778  | ENSG00000105501 |
| Neutrophils        | CD93      | 202878.s_at | 22918 | ENSG00000125810 |
| Neutrophils        | MGAM      | 206522.at   | 8972  | ENSG00000257335 |
| Neutrophils        | MGAM      | 206522.at   | 8972  | ENSG00000282607 |
| Neutrophils        | ALPL      | 215783.s_at | 249   | ENSG00000162551 |
| Neutrophils        | FPR1      | 205119.s_at | 2357  | ENSG00000171051 |
| Neutrophils        | CD93      | 202877.s_at | 22918 | ENSG00000125810 |
| Neutrophils        | PDE4B     | 222326.at   | 5142  | ENSG00000184588 |
| Neutrophils        | LILRB2    | 210146.x_at | 10288 | ENSG00000274513 |
| Neutrophils        | LILRB2    | 210146.x_at | 10288 | ENSG00000131042 |
| Neutrophils        | LILRB2    | 210146.x_at | 10288 | ENSG00000275463 |
| Neutrophils        | LILRB2    | 210146.x_at | 10288 | ENSG00000277751 |
| Neutrophils        | LILRB2    | 210146.x_at | 10288 | ENSG00000276146 |
| SW480 cancer cells | KRT5      | 201820.at   | 3852  | ENSG00000186081 |
| SW480 cancer cells | RBP1      | 203423.at   | 5947  | ENSG00000114115 |
| SW480 cancer cells | TRIM29    | 202504.at   | 23650 | ENSG00000137699 |

|                    |           |             |       |                 |
|--------------------|-----------|-------------|-------|-----------------|
| SW480 cancer cells | DEFA5     | 207529_at   | 1670  | ENSG00000164816 |
| SW480 cancer cells | BMP4      | 211518_s_at | 652   | ENSG00000125378 |
| SW480 cancer cells | EEF1A2    | 204540_at   | 1917  | ENSG00000101210 |
| SW480 cancer cells | VSNL1     | 203797_at   | 7447  | ENSG00000163032 |
| SW480 cancer cells | ASPSCR1   | 218908_at   | 79058 | ENSG00000169696 |
| SW480 cancer cells | IGF2      | 202409_at   | 3481  | ENSG00000167244 |
| SW480 cancer cells | IGF2      | 202409_at   | 3481  | ENSG00000129965 |
| SW480 cancer cells | MFAP2     | 203417_at   | 4237  | ENSG00000117122 |
| SW480 cancer cells | FGF3      | 214571_at   | 2248  | ENSG00000186895 |
| SW480 cancer cells | S100A2    | 204268_at   | 6273  | ENSG00000196754 |
| SW480 cancer cells | INHBB     | 205258_at   | 3625  | ENSG00000163083 |
| SW480 cancer cells | JAG2      | 209784_s_at | 3714  | ENSG00000184916 |
| SW480 cancer cells | LOC89944  | 213713_s_at | 89944 | ENSG00000149328 |
| SW480 cancer cells | BAMBI     | 203304_at   | 25805 | ENSG00000095739 |
| SW480 cancer cells | JAG2      | 32137_at    | 3714  | ENSG00000184916 |
| SW480 cancer cells | BMP7      | 209591_s_at | 655   | ENSG00000101144 |
| SW480 cancer cells | RPP25     | 219143_s_at | 54913 | ENSG00000178718 |
| SW480 cancer cells | RHOD      | 209885_at   | 29984 | ENSG00000173156 |
| SW480 cancer cells | DHRS2     | 214079_at   | 10202 | ENSG00000100867 |
| SW480 cancer cells | ITGB4     | 204989_s_at | 3691  | ENSG00000132470 |
| SW480 cancer cells | NTSR1     | 207360_s_at | 4923  | ENSG00000101188 |
| SW480 cancer cells | STRA6     | 221701_s_at | 64220 | ENSG00000137868 |
| SW480 cancer cells | SLC1A5    | 208916_at   | 6510  | ENSG00000105281 |
| SW480 cancer cells | VSNL1     | 203798_s_at | 7447  | ENSG00000163032 |
| SW480 cancer cells | FKBP4     | 200894_s_at | 2288  | ENSG00000004478 |
| SW480 cancer cells | S100A3    | 206027_at   | 6274  | ENSG00000188015 |
| SW480 cancer cells | TEAD4     | 41037_at    | 7004  | ENSG00000197905 |
| SW480 cancer cells | KLK6      | 204733_at   | 5653  | ENSG00000167755 |
| SW480 cancer cells | CCND1     | 208711_s_at | 595   | ENSG00000110092 |
| SW480 cancer cells | SLC27A5   | 219733_s_at | 10998 | ENSG00000083807 |
| SW480 cancer cells | HOXA9     | 214651_s_at | 3205  | ENSG00000078399 |
| SW480 cancer cells | F12       | 205774_at   | 2161  | ENSG00000131187 |
| SW480 cancer cells | LRFN4     | 219491_at   | 78999 | ENSG00000173621 |
| SW480 cancer cells | NM_024609 | 218678_at   | 10763 | ENSG00000132688 |
| SW480 cancer cells | SLC6A8    | 210854_x_at | 6535  | ENSG00000130821 |
| SW480 cancer cells | PCTK1     | 207239_s_at | 5127  | ENSG00000102225 |
| SW480 cancer cells | SLC6A8    | 213843_x_at | 6535  | ENSG00000130821 |
| SW480 cancer cells | KRT13     | 207935_s_at | 3860  | ENSG00000171401 |
| Normal mucosa      | TSPAN8    | 203824_at   | 7103  | ENSG00000127324 |
| Normal mucosa      | LGALS4    | 204272_at   | 3960  | ENSG00000171747 |
| Normal mucosa      | LGALS4    | 204272_at   | 3960  | ENSG00000282992 |
| Normal mucosa      | DCN       | 201893_x_at | 1634  | ENSG00000011465 |
| Normal mucosa      | COL3A1    | 215076_s_at | 1281  | ENSG00000168542 |
| Normal mucosa      | COL3A1    | 201852_x_at | 1281  | ENSG00000168542 |
| Normal mucosa      | CEACAM5   | 201884_at   | 1048  | ENSG00000105388 |
| Normal mucosa      | TAGLN     | 205547_s_at | 6876  | ENSG00000149591 |
| Normal mucosa      | KRT20     | 213953_at   | 54474 | ENSG00000263057 |
| Normal mucosa      | KRT20     | 213953_at   | 54474 | ENSG00000171431 |
| Normal mucosa      | DCN       | 211896_s_at | 1634  | ENSG00000011465 |
| Normal mucosa      | MYH11     | 201497_x_at | 4629  | ENSG00000133392 |
| Normal mucosa      | MYH11     | 201497_x_at | 4629  | ENSG00000276480 |
| Normal mucosa      | FXYD3     | 202489_s_at | 5349  | ENSG00000089356 |
| Normal mucosa      | ACTG2     | 202274_at   | 72    | ENSG00000163017 |
| Normal mucosa      | MYLK      | 202555_s_at | 4638  | ENSG00000065534 |

|               |         |             |       |                 |
|---------------|---------|-------------|-------|-----------------|
| Normal mucosa | TPM1    | 210987_x_at | 7168  | ENSG00000140416 |
| Normal mucosa | CDH17   | 209847_at   | 1015  | ENSG00000079112 |
| Normal mucosa | NFIB    | 209289_at   | 4781  | ENSG00000147862 |
| Normal mucosa | MGP     | 202291_s_at | 4256  | ENSG00000111341 |
| Normal mucosa | SPARCL1 | 200795_at   | 8404  | ENSG00000152583 |
| Normal mucosa | RGS5    | 209071_s_at | 8490  | ENSG00000232995 |
| Normal mucosa | RGS5    | 209071_s_at | 8490  | ENSG00000143248 |
| Normal mucosa | MYH11   | 207961_x_at | 4629  | ENSG00000133392 |
| Normal mucosa | MYH11   | 207961_x_at | 4629  | ENSG00000276480 |
| Normal mucosa | PPAP2B  | 212226_s_at | 8613  | ENSG00000162407 |
| Normal mucosa | COL3A1  | 211161_s_at | 1281  | ENSG00000168542 |
| Normal mucosa | IGFBP7  | 201162_at   | 3490  | ENSG00000163453 |
| Normal mucosa | PPAP2B  | 209355_s_at | 8613  | ENSG00000162407 |
| Normal mucosa | CALD1   | 201616_s_at | 800   | ENSG00000122786 |
| Normal mucosa | C1R     | 212067_s_at | 715   | ENSG00000159403 |
| Normal mucosa | CALD1   | 212077_at   | 800   | ENSG00000122786 |
| Normal mucosa | AGR2    | 209173_at   | 10551 | ENSG00000106541 |
| Normal mucosa | GNA11   | 564_at      | 2767  | ENSG00000088256 |
| Normal mucosa | HEPH    | 203903_s_at | 9843  | ENSG00000089472 |
| Normal mucosa | GNA11   | 213944_x_at | 2767  | ENSG00000088256 |
| Normal mucosa | GNG12   | 212294_at   | 55970 | ENSG00000172380 |
| Normal mucosa | ADH1B   | 209612_s_at | 125   | ENSG00000196616 |
| Normal mucosa | TPM1    | 206116_s_at | 7168  | ENSG00000140416 |
| Normal mucosa | CRIM1   | 202551_s_at | 51232 | ENSG00000277354 |
| Normal mucosa | CRIM1   | 202551_s_at | 51232 | ENSG00000150938 |
| Normal mucosa | FBLN1   | 202994_s_at | 2192  | ENSG00000077942 |
| Normal mucosa | IGFBP5  | 211959_at   | 3488  | ENSG00000115461 |
| Normal mucosa | LAMA4   | 202202_s_at | 3910  | ENSG00000112769 |
| Normal mucosa | CAV1    | 212097_at   | 857   | ENSG00000105974 |
| Normal mucosa | WASL    | 205809_s_at | 8976  | ENSG00000106299 |
| Blood vessels | CDH5    | 204677_at   | 1003  | ENSG00000179776 |
| Lymph vessels | PDPN    | 204879_at   | 10630 | ENSG00000162493 |
| Lymph vessels | VEGFC   | 209946_at   | 7424  | ENSG00000150630 |
| Lymph vessels | FIGF    | 206742_at   | 2277  | ENSG00000165197 |

---
